# Supplementary material for: Consent and recruitment: the reporting of paediatric trials published in 2012
Source: PubMed Central journal article supplement — BMJ Paediatr Open. 2018 Nov 26;2(1):e000369. doi: 10.1136/bmjpo-2018-000369 (PMC6267313; doi:10.1136/bmjpo-2018-000369), 2018-11-26
Supplement: bmjpo-2018-000369.draft_revisions.pdf [file bmjpo-2018-000369.draft_revisions.pdf]

# BMJ Paediatrics Open

BMJ Paediatrics Open is committed to open peer review. As part of this commitment we make the peer review history of every article we publish publicly available.

When an article is published we post the peer reviewers' comments and the authors' responses online. We also post the versions of the paper that were used during peer review. These are the versions that the peer review comments apply to.

The versions of the paper that follow are the versions that were submitted during the peer review process. They are not the versions of record or the final published versions. They should not be cited or distributed as the published version of this manuscript.

BMJ Paediatrics Open is an open access journal and the full, final, typeset and author-corrected version of record of the manuscript is available on our site with no access controls, subscription charges or pay-per-view fees (<http://bmjpaedsopen.bmj.com>).

If you have any questions on BMJ Paediatrics Open's open peer review process please email [info.bmjpo@bmj.com](mailto:info.bmjpo@bmj.com)

## BMJ Paediatrics Open

### Consent and recruitment in pediatric research: an evaluation of trials published in 2012

|                               |                                                                                                                                                                                                                                                                                                                                                                                                                                                                                                                                                                                                                                                                                                                                                                                                                                                            |
|-------------------------------|------------------------------------------------------------------------------------------------------------------------------------------------------------------------------------------------------------------------------------------------------------------------------------------------------------------------------------------------------------------------------------------------------------------------------------------------------------------------------------------------------------------------------------------------------------------------------------------------------------------------------------------------------------------------------------------------------------------------------------------------------------------------------------------------------------------------------------------------------------|
| Journal:                      | <i>BMJ Paediatrics Open</i>                                                                                                                                                                                                                                                                                                                                                                                                                                                                                                                                                                                                                                                                                                                                                                                                                                |
| Manuscript ID                 | bmjpo-2018-000369                                                                                                                                                                                                                                                                                                                                                                                                                                                                                                                                                                                                                                                                                                                                                                                                                                          |
| Article Type:                 | Original article                                                                                                                                                                                                                                                                                                                                                                                                                                                                                                                                                                                                                                                                                                                                                                                                                                           |
| Date Submitted by the Author: | 05-Sep-2018                                                                                                                                                                                                                                                                                                                                                                                                                                                                                                                                                                                                                                                                                                                                                                                                                                                |
| Complete List of Authors:     | Gates, Allison; University of Alberta, Pediatrics<br>Caldwell, Patrina; University of Sydney, Discipline of Child and Adolescent Health and Centre for Kidney Research<br>Curtis, Sarah; University of Alberta, Department of Pediatrics<br>Dans, Leonila; University of the Philippines<br>Fernandes, Ricardo; Universidade de Lisboa, Faculdade de Medicina; Centro Hospitalar Lisboa Norte EPE, Department of Pediatrics<br>Hartling, Lisa; University of Alberta, Department of Pediatrics<br>Kelly, Lauren; University of Manitoba, Department of Pediatrics and Child Health; George and Fay Yee Centre for Healthcare Innovation, Clinical Trials Platform<br>Williams, Katrina; Royal Children's Hospital Melbourne; University of Melbourne<br>Woolfall, Kerry; Univ Liverpool<br>Dyson, Michele; University of Alberta, Department of Pediatrics |
| Keywords:                     | Data Collection, General Paediatrics                                                                                                                                                                                                                                                                                                                                                                                                                                                                                                                                                                                                                                                                                                                                                                                                                       |
|                               |                                                                                                                                                                                                                                                                                                                                                                                                                                                                                                                                                                                                                                                                                                                                                                                                                                                            |

SCHOLARONE™  
Manuscripts

1  
2  
3 **Title:** Consent and recruitment in pediatric research: an evaluation of trials published in 2012  
4

5 **Authors:** Allison Gates, PhD<sup>a,b</sup>, Patrina Caldwell, PhD<sup>c</sup>, Sarah Curtis, MD<sup>b</sup>, Leonila Dans, MD<sup>d</sup>, Ricardo M  
6 Fernandes, MD, PhD<sup>e,f</sup>, Lisa Hartling, PhD<sup>a,b</sup>, Lauren E Kelly, PhD<sup>g,h</sup>, Katrina Williams, PhD<sup>i,j,k</sup>, Kerry  
7 Woolfall, PhD<sup>l</sup>, Michele P Dyson, PhD<sup>a,b</sup>  
8  
9

10  
11 **Affiliations:** <sup>a</sup>Alberta Research Centre for Health Evidence, University of Alberta, Edmonton, Canada;  
12 <sup>b</sup>Department of Pediatrics, University of Alberta, Edmonton, Canada; <sup>c</sup>Discipline of Child and Adolescent  
13 Health and Centre for Kidney Research, The University of Sydney, Sydney, Australia; <sup>d</sup>University of the  
14 Phillippines, Manila, Philippines; <sup>e</sup>Instituto de Medicina Molecular, Faculdade de Medicina, Universidade  
15 de Lisboa, Portugal; <sup>f</sup>Department of Pediatrics, Hospital de Santa Maria, Centro Hospitalar Lisboa Norte,  
16 Portugal; <sup>g</sup>Department of Pediatrics and Child Health, University of Manitoba, Winnipeg, Canada;  
17 <sup>h</sup>Clinical Trials Platform, George and Fay Yee Centre for Healthcare Innovation, Winnipeg, Canada; <sup>i</sup>Royal  
18 Children's Hospital, Melbourne, Australia; <sup>j</sup>University of Melbourne, Melbourne, Australia; <sup>k</sup>Murdoch  
19 Childrens Research Institute, Melbourne, Australia; and <sup>l</sup>Institute of Psychology, Health and Society,  
20 University of Liverpool, Liverpool, United Kingdom  
21  
22  
23  
24  
25  
26  
27  
28  
29

30 **Address correspondence to:** Dr. Allison Gates, Department of Pediatrics, University of Alberta, ECHA 4-  
31 482C, 11405 87 Ave NW, Edmonton, Alberta, Canada T6G 1C9, agates1@ualberta.ca, Phone: +1-780-  
32 492-8252, Fax: +1-780-248-5627.  
33  
34  
35

36 **Word count:** 2500 words

37 **Key words:** pediatrics; medicine; clinical studies; study design  
38  
39  
40  
41  
42  
43  
44  
45  
46  
47  
48  
49  
50  
51  
52  
53  
54  
55  
56  
57  
58  
59  
60

**ABSTRACT**

**Objectives.** We evaluated 300 pediatric trials to determine: the consent and recruitment strategies used; how trial information was presented to families; how incentives were used; and if they achieved their recruitment targets.

**Methods.** For this cross-sectional evaluation, we searched the Cochrane Central Register of Controlled trials for pediatric trials published in 2012 and randomly selected 300 that reported on outcomes for participants aged  $\leq 21$  years. We collected data on consent and recruitment procedures for each trial and undertook descriptive analyses in SPSS Statistics.

**Results.** All but one trial (99.7%) used a standard recruitment strategy. Most (92%) trials reported that consent was obtained but only 13% reported who obtained consent. Two-thirds (65%) of trials included school-aged participants, and of these 68% reported obtaining assent. Half (50%) of the trials reported who the trial information was targeted to. Most trials (75%) of school-aged participants targeted information toward children or children and their parents. Fourteen percent of trials reported using incentives, half (50%) of which were in the form of compensation. Only 48% of trials reported sufficient data to determine if their recruitment targets were achieved. Of these, 70% achieved their targets.

**Conclusions.** Notable reporting shortcomings included: how families were recruited into the trial; who obtained consent and/or assent and how; who trial information was directed to; whether incentives were used; and sufficient data to determine if the recruitment target was achieved. Forthcoming pediatric-specific reporting standards may improve reporting in this priority area. Our data provide a baseline for ongoing monitoring of the state of the research.

**WHAT IS KNOWN ABOUT THE SUBJECT**

- In 2012, Standards for Research in (StaR) Child Health published evidence-based guidance to inform ethically-sound recruitment and consent in pediatric trials, and identified knowledge gaps.
- To optimize the value of children’s participation in research, trialists must safeguard them from avoidable harm, use rigorous methodologies, and report their findings transparently.

**WHAT THIS STUDY ADDS**

- We collected data on the reporting of consent and recruitment procedures from a random sample of 300 pediatric trials published in 2012.
- Reporting shortcomings included: how families were recruited; who obtained consent/assent; who trial information was directed to; whether incentives were used; if recruitment targets were reached.
- The data from this study will serve as a baseline for ongoing monitoring and evaluation of the state of the research.

## INTRODUCTION

In 2012, Standards for Research in (StaR) Child Health published six evidence-based Standards to guide the rigorous design, conduct, and reporting of pediatric trials.<sup>1, 2</sup> Each Standard<sup>3-8</sup> includes practice recommendations and a research agenda to address knowledge gaps. To characterize the state of the literature, we analyzed a random sample of 300 pediatric trials published in 2012<sup>9</sup> and identified various shortcomings in their conduct and reporting. Among other issues, most trials reported results that were at unclear or high risk of bias, and only 46% were registered in a clinical trial registry.<sup>9</sup>

Trialists are ethically obligated to optimize the value of children's participation in research by safeguarding them from avoidable harms,<sup>10, 11</sup> using rigorous methodologies,<sup>12</sup> and reporting their findings transparently.<sup>13</sup> Ethically-sound recruitment and consent procedures include: obtaining consent from parents and assent from children; approaching all eligible children, and providing families with age-appropriate trial information; ensuring that incentives do not influence children's decision-making; and clearly differentiating between elements of standard care and those that are part of the trial.<sup>3</sup> Safeguarding children from avoidable harm also includes carefully planned recruitment targets. Trials that recruit too many participants needlessly expose children to the burdens of research participation, while those that are underpowered to detect clinically meaningful effects contribute to research waste.<sup>14</sup>

In response to the knowledge gaps and priorities identified by the Consent and Recruitment Standard Development Group, we evaluated the consent and recruitment procedures for 300 pediatric trials to determine: the consent and recruitment strategies used; the formats used to present trial information to families; how incentives were used; and whether they achieved their recruitment targets.

## METHODS

### Context

The analyses presented herein are part of a larger study<sup>9, 15</sup> in which we characterized the conduct and reporting qualities of 300 pediatric trials published in 2012. A full description of the study methods appears in a previous publication.<sup>9</sup>

### Database search

1  
2  
3 In November 2013, we searched the Cochrane Central Register of Controlled Trials for randomized trials  
4 published in 2012 (Supplementary File 1). The Cochrane Central Register of Controlled Trials is a  
5 comprehensive database of reports of randomized and quasi-randomized trials, taken mainly from  
6 MEDLINE and Embase.<sup>16</sup> The 2012 publication date coincided with the publication of the StaR Child  
7 Health Standards.  
8  
9

### 10 11 12 13 **Trial selection**

14 We identified 2296 unique records via the search. We ordered these randomly in Excel (v. 2016;  
15 Microsoft Corporation, Redmond, Washington) and selected the first 300 published trials that reported  
16 on outcomes specific to participants  $\leq 21$  years of age (mean age at baseline). The sample size coincides  
17 with our previous evaluations of pediatric trials published in 2007.<sup>15</sup> We did not restrict our sample by  
18 language, condition, intervention, or outcome type.  
19  
20  
21  
22  
23

### 24 25 **Data extraction**

26 For each included trial, we extracted data into REDCap (Research Electronic Data Capture)<sup>17</sup> pertaining  
27 to the characteristics of the: publication; trial design; intervention; trial conduct; trial sample; data  
28 monitoring committee and follow-up; outcomes and conclusions; risk of bias; and trial registration and  
29 protocol.<sup>9</sup> We also collected additional data to address the knowledge gaps and priorities outlined by  
30 the Standard Development Groups. An author (AG or MPD) verified the extracted data to identify errors  
31 or omissions.  
32  
33  
34  
35  
36  
37

38 Our data extraction guide for the variables included in this report is in Supplementary File 2. We  
39 classified the primary diagnostic category according to the World Health Organization's International  
40 Statistical Classification of Diseases and Related Health Problems 10<sup>th</sup> Revision.<sup>18</sup> We classified  
41 participants' recruitment location according to the International Monetary Fund classification system.<sup>19</sup>  
42 We classified the recruitment strategy as standard if the participants provided consent and were then  
43 randomized in a typical manner (e.g., 1:1, 1:2). We classified the reasons for recruitment delays based  
44 on the definitions provided by Kaur et al.<sup>20</sup> We categorized incentives as one or more of the following:  
45 reimbursements (costs associated with participation that are paid back, e.g., parking, travel);  
46 compensation (participants are paid a modest amount for their time and effort); tokens of appreciation  
47 (a small gift given at the end of the trial, usually not known beforehand); and incentive payments  
48 (typically known before participation and used to enhance recruitment).  
49  
50  
51  
52  
53  
54  
55  
56  
57  
58  
59  
60

We referred to protocols, trial registries, and associated publications to complement data extraction. We searched for trial registers in the International Clinical Trials Registry Platform, the ISRCTN Registry, and via Google. We located trial registers for 46% (n = 138/300) of the trials.<sup>9</sup> We used protocols or companion articles only when cited in the publications. We did not contact authors to collect consent and recruitment details beyond those in published reports.

### Data analysis

We exported the data to an Excel workbook for cleaning and to SPSS Statistics (v. 23; IBM Corporation, Armonk, New York) for descriptive analysis. We determined whether the recruitment target was reached by comparing the result of the sample size calculation to the number of participants enrolled in the trial.

## RESULTS

### Patient population and consent and recruitment procedures

Table 1 shows details of the patient population and consent and recruitment procedures. Most trials recruited from established market economies<sup>19</sup> (n = 188/300, 63%) and 68% (n = 205/300) reported excluding patients with co-morbid or chronic diseases. Only one trial (n = 1/300, 0.3%) reported using a non-standard recruitment strategy (Zelen's design). Only one trial (n = 1/300, 0.3%) reported a specified amount of time (seven days) for participants to decide whether to enroll. Seventeen percent (n = 51/300) of trials reported who first spoke to the family about participating. The most common point of contact was a researcher or clinician unknown to the participant (n = 28/51, 55%).

Most trials reported that consent was obtained (n = 275/300, 92%), but only 13% (n = 39/300) reported who obtained consent. Ninety percent (n = 270/300) of trials reported how consent was provided. Among these, 55% (n = 149/270) obtained consent via parental permission and 43% (n = 117/270) via parental permission combined with participant assent. Four trials (2%) reported only obtaining the consent of a mature minor. These included trials of the following: corrective exercises for scoliosis; prevention of acute knee injuries in athletes; bright-light therapy of non-seasonal depression; and oxidant and antioxidant levels in patients with orthodontic tooth movement. Of trials that included school-aged participants (>5 years old; n = 196/300, 65%), 68% (n = 117/172) reported obtaining participant assent and 32% (n = 55/172) reported obtaining parental permission only. Three percent (n =



9/300) of trials reported that participants and families were involved in the design or conduct of the trial.

Nineteen percent (n = 56/300) of trials did not report the recruitment setting (or it was unclear). When clearly reported, most often trials recruited participants from inpatient populations (n = 74/300, 25%), outpatient populations (n = 51/300, 17%), or schools (n = 70/300, 23%).

**Table 1.** Characteristics of the patient populations and recruitment approaches (N = 300)

| Characteristic                                                        | n (%)      |
|-----------------------------------------------------------------------|------------|
| <b>Recruitment location*</b>                                          |            |
| Established market economy                                            | 188 (62.7) |
| Transitional country                                                  | 19 (6.3)   |
| Developing country                                                    | 96 (32.0)  |
| <b>Primary diagnostic category**</b>                                  |            |
| Mental and behavioral disorders                                       | 50 (16.7)  |
| Infectious and parasitic disease                                      | 39 (13.0)  |
| Respiratory system                                                    | 30 (10.0)  |
| Conditions originating in the perinatal period                        | 28 (9.3)   |
| Endocrine, nutritional, and metabolic diseases                        | 25 (8.3)   |
| Oral health                                                           | 19 (6.3)   |
| Factors influencing health status and contact with health services    | 13 (4.3)   |
| Digestive system                                                      | 10 (3.3)   |
| Blood, blood forming organs, and immune mechanism                     | 7 (2.3)    |
| Congenital malformations, deformations, and chromosomal abnormalities | 7 (2.3)    |
| Nervous system                                                        | 7 (2.3)    |
| Eye and adnexa                                                        | 5 (1.7)    |
| Ear and mastoid process                                               | 4 (1.3)    |
| Injury, poisoning, and consequences of external causes                | 4 (1.3)    |
| Circulatory system                                                    | 3 (1.0)    |
| External causes of morbidity and mortality                            | 3 (1.0)    |
| Genitourinary system                                                  | 3 (1.0)    |
| Musculoskeletal system and connective tissue                          | 3 (1.0)    |
| Neoplasms                                                             | 3 (1.0)    |
| Pregnancy, childbirth, and the puerperium                             | 2 (0.7)    |
| Skin and subcutaneous tissue                                          | 2 (0.7)    |
| Other                                                                 | 33 (11.0)  |
| <b>Exclusion of patients with chronic diseases</b>                    |            |
| Yes                                                                   | 205 (68.3) |
| No                                                                    | 59 (19.7)  |
| Unclear                                                               | 36 (12.0)  |
| <b>Recruitment strategy</b>                                           |            |

|                                                           |            |
|-----------------------------------------------------------|------------|
| Standard                                                  | 299 (99.7) |
| Not standard                                              | 1 (0.3)    |
| <b>Time to decide whether to enroll</b>                   |            |
| Limited                                                   | 1 (0.3)    |
| Not reported                                              | 299 (99.7) |
| <b>Who first approached the patient</b>                   |            |
| Child's clinician                                         | 8 (2.7)    |
| Researcher or clinician unknown to patient                | 28 (9.3)   |
| Other                                                     | 15 (5.0)   |
| Not reported                                              | 249 (83.0) |
| <b>Consent obtained and reported</b>                      |            |
| Yes                                                       | 275 (91.7) |
| No                                                        | 25 (8.3)   |
| <b>Who obtained consent</b>                               |            |
| Child's clinician                                         | 2 (0.7)    |
| Researcher or clinician unknown to patient                | 31 (10.3)  |
| Other                                                     | 6 (2.0)    |
| Not reported                                              | 261 (87.0) |
| <b>How consent was provided</b>                           |            |
| Parental permission                                       | 149 (49.7) |
| Parental permission and participant assent                | 117 (39.0) |
| Consent of a mature minor                                 | 4 (1.3)    |
| Not reported                                              | 30 (10.0)  |
| <b>Patients/families involved in trial design/conduct</b> |            |
| Reported                                                  | 9 (3.0)    |
| Not reported                                              | 291 (97.0) |
| <b>Source of recruitment***</b>                           |            |
| Inpatients                                                | 74 (24.7)  |
| Outpatients                                               | 51 (17.0)  |
| Clinician's office                                        | 38 (12.7)  |
| School                                                    | 70 (23.3)  |
| Community                                                 | 44 (14.7)  |
| Other                                                     | 14 (4.7)   |
| Unclear or not reported                                   | 56 (18.7)  |

\*Defined according to the International Monetary Fund classification system (2013).<sup>19</sup> Totals to 303 because three trials recruited from more than one category.

\*\*Defined according to the International Statistical Classification of Diseases and Related Health Problems 10<sup>th</sup> Revision (2010).<sup>18</sup> These data have been previously reported, but are shown here for context.<sup>9</sup>

\*\*\*Total exceeds 300 because some trials reported multiple sources.

### Formats used to present trial information to participants and families

About two-thirds (n = 184/300, 61%) of trials reported how families were informed about the opportunity to participate (Table 2). Of these, 59% (n = 108/184) reported that parents were

approached during a healthcare visit, 8% (n = 15/184) used mail invites, 4% (n = 7/184) approached parents by telephone, 14% (n = 26/184) used media messages (e.g., via the radio, newspaper, or a website), and 11% (n = 20/184) used pamphlets. Other methods (n = 63/184, 34%) included schools (i.e., school staff contacted parents about the trial), community contacts and word of mouth; and identifying potential participants through chart reviews or previous trials. Sixteen percent (n = 30/184) of trials used multiple means of informing families about the opportunity to participate.

Half (n = 151/300, 50%) of the trials reported the person who was the target of the trial information. Of these, 58% (n = 88/151) targeted the information toward parents, 37% (n = 56/151) toward parents and children, and 5% (n = 7/151) toward children only. Although it was not reported, we assumed that an additional 13% (n = 40/300) intended the information to be for parents, as participants were infants or children less than school age. When it was reported, all trials that included only participants ≤5 years of age directed the information to parents only (n = 64/64, 100%). Most trials (n = 65/87, 75%) that included participants >5 years of age directed trial information either to children or both parents and children. All of the trials (n = 5/5, 100%) in which information was directed specifically toward children were conducted in adolescents.

**Table 2.** Formats used to present trial information to participants and families (N = 300)

| Characteristic                               | n (%)      |
|----------------------------------------------|------------|
| <b>How the family heard about the trial*</b> |            |
| Approached during healthcare visit           | 108 (36.0) |
| Mailing                                      | 15 (5.0)   |
| Generalized mailing                          | 4 (1.3)    |
| Targeted mailing                             | 9 (3.0)    |
| Personalized mailing                         | 2 (0.7)    |
| Phone calls                                  | 7 (2.3)    |
| Media                                        | 26 (8.7)   |
| Pamphlets                                    | 20 (6.7)   |
| Other                                        | 63 (21.0)  |
| Not reported                                 | 116 (38.7) |
| <b>Who trial information was targeted to</b> |            |
| Parents                                      | 88 (29.3)  |
| Children                                     | 7 (2.3)    |
| Parents and children                         | 56 (18.7)  |
| Not reported                                 | 149 (49.7) |

\*Total exceeds 300 because some trials used multiple approaches.

### Use of incentives

Most trials did not report whether incentives were used ( $n = 253/300$ , 84%) and five (2%) reported not using incentives (Table 3). Fourteen percent ( $n = 42/300$ ) of trials reported using incentives. These were most often in the form of compensation ( $n = 21/42$ , 50%) or tokens of appreciation ( $n = 12/42$ , 29%). Reported compensation amounts varied, e.g., free dental care and \$20 for families participating in a 5-year dental amalgam trial; \$5 to \$10 gift cards for adolescents participating in a trial of telephone-based preventive health education and counseling. Tokens of appreciation also varied, e.g., an insecticide impregnated bed net and soap for families participating in a trial of therapeutic food for catch-up growth after malaria; \$40 for teachers participating in a trial of a school-based intervention.

The child was often the recipient of the incentive, rather than the parents or family: 20% ( $n = 1/5$ ) of reimbursements (e.g., \$5 for a bus ticket for travel for adolescents participating in a trial of exercise training for obesity), 48% ( $n = 10/21$ ) of compensation incentives (e.g., \$10 for completing a survey for adolescents participating in a trial of a preventive family intervention), 50% ( $n = 6/12$ ) of tokens of appreciation (e.g., \$10 gift certificate for completing a five week trial of coping skills training for adolescents with asthma, and a six week follow-up assessment), and 83% ( $n = 5/6$ ) of incentive payments (e.g., \$50 supermarket gift cards for adolescents participating in a trial of a multicomponent dietary intervention) were intended for the participant.

**Table 3.** Use of incentives (N = 300)

| Characteristic                     | n (%)        |
|------------------------------------|--------------|
| <b>Use of incentives</b>           |              |
| Yes                                | 42 (14.0)    |
| No                                 | 5 (1.7)      |
| Not reported                       | 253 (84.3)   |
| <b>Type(s) of incentives used*</b> |              |
| Reimbursements                     | 5/42 (11.9)  |
| Compensation                       | 21/42 (50.0) |
| Tokens of appreciation             | 12/42 (28.6) |
| Incentive payments                 | 6/42 (14.3)  |

\*Total exceeds 42 because some trials used multiple types of incentives.

### Recruitment target attainment

About half ( $n = 145/300$ , 48%) of the trials reported sufficient information to determine if the recruitment target was achieved (Table 4). Of these, 70% ( $n = 102/145$ ) recruited their target sample size. Recruitment delays were reported in 6% ( $n = 19/300$ ) of trials, and were most often due to patient level ( $n = 10/19$ , 53%; e.g., travel, duration of trial, preferences) or trial level factors ( $n = 9/19$ , 47%; e.g.,

1  
2  
3 funding, trial management, feasibility). Strategies to address recruitment delays included stopping the  
4 trial before the recruitment target was achieved (n = 13/19, 68%), extending the recruitment period (n =  
5 3/19, 16%), adding trial sites (n = 2/19, 11%), modifying the eligibility criteria (n = 3/19, 16%), and  
6 modifying the incentives (n = 1/19, 5%).  
7  
8  
9

10  
11  
12 **Table 4.** Recruitment target attainment (N = 300)

| Characteristic                                  | n (%)          |
|-------------------------------------------------|----------------|
| <b>Sample size</b>                              |                |
| Calculation reported                            | 155 (51.7)     |
| Recruitment target reached*                     | 102/145 (70.3) |
| <b>Recruitment delays reported</b>              |                |
| Yes                                             | 19 (6.3)       |
| No                                              | 281 (93.7)     |
| <b>Types of recruitment delays**</b>            |                |
| Trial level factors                             | 9/19 (47.4)    |
| Site level factors                              | 1/19 (5.3)     |
| Patient level factors                           | 10/19 (52.6)   |
| Trial team level factors                        | 1/19 (5.3)     |
| Not specified                                   | 4/19 (21.1)    |
| <b>How recruitment delays were addressed***</b> |                |
| Extending the recruitment period                | 3/19 (15.8)    |
| Adding additional trial sites                   | 2/19 (10.5)    |
| Modifying the eligibility criteria              | 3/19 (15.8)    |
| Modifying incentives                            | 1/19 (5.3)     |
| Stopping the trial before reaching the target   | 13/19 (68.4)   |

13  
14  
15  
16  
17  
18  
19  
20  
21  
22  
23  
24  
25  
26  
27  
28  
29  
30  
31  
32  
33  
34  
35 \*Based on sample size calculation and number randomized; data for this calculation were unavailable  
36 for 10 trials that reported a sample size calculation.

37 \*\*Total exceeds 19 because some trials reported more than one type of delay.

38 \*\*\*Total exceeds 19 because some trials reported more than one method.  
39  
40

## 41 DISCUSSION

42 This study addresses some of the knowledge gaps and priorities identified by StaR Child Health's  
43 Consent and Recruitment Standard Development Group.<sup>3</sup> We found that details of consent and  
44 recruitment procedures were infrequently reported within publications of pediatric trials. Although  
45 most trials reported obtaining consent, elaboration on the consent and recruitment process was not  
46 common.  
47  
48  
49  
50

51  
52 Despite being widely accepted as a requirement,<sup>11, 21</sup> there remains ambiguity about what constitutes  
53 assent in pediatric trials,<sup>22</sup> which children are capable of providing it,<sup>22</sup> and how it should be reported.<sup>23</sup>  
54  
55

56 Recently, Tait and Geisser (2017) established an operational definition of assent, including  
57  
58  
59

1  
2  
3 recommendations about the level of information appropriate for different ages.<sup>24</sup> Nevertheless,  
4 guidance on the age at which children must provide assent varies substantially by country.<sup>25-27</sup> It also  
5 remains unclear whether the level of detail regarding consent and recruitment procedures required by  
6 research ethics boards is appropriate or necessary in published reports of pediatric trials. In 2010, Saint-  
7 Raymond et al. called attention to the need for reporting guidelines specific to research with children.<sup>23</sup>  
8 The development of pediatric adaptations of the Standard Protocol Items: Recommendations for  
9 Interventional Trials<sup>28</sup> and Consolidated Standards of Reporting Trials<sup>29</sup> statements is underway.<sup>30</sup>  
10  
11  
12  
13  
14  
15

16 Fewer than 20% of trials reported who approached families to participate. Although a relationship to the  
17 person obtaining consent can encourage recruitment,<sup>31</sup> when the person is the child's healthcare  
18 provider parents may worry that refusing participation will impact their child's quality of care.<sup>22</sup> In most  
19 trials of school-aged children, trial information was directed to both parents and children. Parents' and  
20 children's understanding of trial materials are fundamental to ethical and efficient recruitment.<sup>3</sup> Not  
21 understanding trial information discourages parents and children from enrolling in trials,<sup>31</sup> and typical  
22 presentations of the benefits and risks of trial participation are often difficult for parents to  
23 understand.<sup>32</sup> The integrated consent model in which clinicians engage the trial participant in a consent  
24 conversation similar to usual care and additionally present the opportunity for the randomization of  
25 previously validated treatment options, has been proposed.<sup>33</sup> This approach has been suggested for low-  
26 risk and pragmatic trials,<sup>33</sup> however the applicability to pediatric trials needs to be established.  
27  
28  
29  
30  
31  
32  
33  
34  
35

36 Few trials reported whether incentives were used, but of those that did, many were intended for  
37 children. Trial participation can be costly for families, and there is general consensus that they should be  
38 reimbursed for the related expenses (e.g., travel, parking) at a rate that is sufficient but does not lead  
39 them to undervalue risks or coerce them to consent.<sup>22, 31</sup> As children value incentives differently than  
40 adults, their provision to minors is controversial.<sup>3, 10</sup> When incentives are used, it is critical that children  
41 understand the implications of the trial and that the incentives do not influence their decision to  
42 participate.<sup>3, 10</sup>  
43  
44  
45  
46  
47  
48  
49

50 Seventy percent of trials met their recruitment targets. This is substantially greater than the 29%  
51 reported in St-Louis et al.'s review of pediatric general surgical trials,<sup>34</sup> and the 55% in Sully et al.'s  
52 review of multicenter trials in the United Kingdom.<sup>35</sup> Failing to meet the recruitment target contributes  
53 to research waste when the trial is underpowered to detect clinically important differences.<sup>36</sup> Due to  
54  
55  
56  
57  
58  
59  
60

1  
2  
3 reporting deficiencies, we could only ascertain whether trials achieved their recruitment targets for half  
4 of the sample. Whether transparent reporting is biased toward trials that meet their recruitment targets  
5 is not yet known.  
6  
7

### 8 9 10 **Strengths and Limitations**

11 We have highlighted a number of conduct and/or reporting gaps in an effort to contribute to the  
12 ongoing research agenda. Our sample will serve as a baseline for ongoing monitoring of consent and  
13 recruitment procedures in pediatric trials. The extracted data were limited to those available within  
14 published reports, therefore we cannot ascertain the extent to which the findings reflect conduct and/or  
15 reporting shortcomings. We used a sample of trials published in 2012, and the findings may not be  
16 generalizable to other years.  
17  
18  
19  
20  
21  
22

### 23 **CONCLUSIONS**

24 In our sample, five reporting shortcomings were evident: how families were recruited; who obtained  
25 consent and/or assent and how; who trial information was directed to; whether incentives were used;  
26 and sufficient data to determine if the recruitment target was met. Forthcoming reporting guidance  
27 specific to pediatric trials<sup>30</sup> and the StaR Child Health Standards<sup>3</sup> may contribute to improving the  
28 conduct and reporting of pediatric trials in this priority area. Using this study as a baseline, continued  
29 monitoring of the state of the research will allow for the identification of changes over time and the  
30 need for knowledge translation efforts.  
31  
32  
33  
34  
35  
36  
37

### 38 **ACKNOWLEDGMENTS**

39 We thank Robin Featherstone (MLIS, University of Alberta, Edmonton, Canada) for running the search  
40 and Sarah Bryson, Huiru Dong, Aimee Gonzalez, Hamza Jafri, Karandeep Jassal, Megan Nuspl, Kassi  
41 Shave, Jocelyn Shulhan, and Jaskiran Sidhu (research assistants at the Alberta Research Centre for  
42 Health Evidence, University of Alberta, Edmonton, Canada) for contributing to data extraction.  
43  
44  
45  
46  
47

### 48 **FUNDING**

49 This research was funded by the Canadian Institutes of Health Research (#KRS 140989). The funder  
50 played no role in the design and conduct of the study; the collection, management, analysis and  
51 interpretation of the data; the preparation, review, or approval of the manuscript; nor the decision to  
52 submit the manuscript for publication.  
53  
54  
55  
56  
57

**COMPETING INTERESTS**

We have no financial or other conflicts of interest to declare.

**CONTRIBUTORS' STATEMENT**

Dr Dyson conceptualized the study, designed the data collection instrument, supervised all aspects of the work, verified and analyzed the extracted data, and contributed to drafting the manuscript.

Dr Gates verified and analyzed the extracted data, contributed to drafting the manuscript, and completed revisions of the manuscript drafts following input from the other authors.

Drs Caldwell, Curtis, Dans, Hartling, Kelly, Fernandes, Woolfall, and Williams contributed to the interpretation of the extracted data, and revised manuscript drafts critically for important intellectual content.

All authors approved the final manuscript as submitted and agree to be accountable for all aspects of the work.

**DATA SHARING STATEMENT**

The data collected and analyzed from trials included in this study will be available to researchers via reasonable request from the corresponding author. The data will be available immediately following, and for 5 years after article publication. Our data extraction guide is available as a supplementary file.

**PREVIOUS PRESENTATION**

Parts of this research were presented as a poster at our local research day (Pediatric Research Day, Department of Pediatrics, University of Alberta, Edmonton, Canada) on 16 May 2018 under the following title: "The safe and ethical participation of children in research: a descriptive analysis of the conduct and reporting of trials published in 2012".



**REFERENCES**

1. Wittmeier KD, Craig J, Klassen TP, et al. The mission of StaR Child Health is to improve the quality of the design, conduct, and reporting of pediatric clinical research by promoting the use of modern research standards. Introduction. *Pediatrics* 2012;129(Suppl 3):S111.
2. Hartling L, Wittmeier KD, Caldwell P, et al. StaR Child Health: developing evidence-based guidance for the design, conduct, and reporting of pediatric trials. *Pediatrics* 2012;129(Suppl 3):S112-17.
3. Caldwell PH, Dans L, de Vries MC, et al. Standard 1: consent and recruitment. *Pediatrics* 2012;129(Suppl 3):S118-23.
4. Ellenberg S, Fernandes RM, Saloojee H, et al. Standard 3: data monitoring committees. *Pediatrics* 2012;129(Suppl 3):S132-7.
5. Hartling L, Hamm M, Klassen T, et al. Standard 2: containing risk of bias. *Pediatrics* 2012;129(Suppl 3):S124-31.
6. Sinha IP, Altman DG, Beresford MW, et al. Standard 5: selection, measurement, and reporting of outcomes in clinical trials in children. *Pediatrics* 2012;129(Suppl 3):S146-52.
7. van der Tweel I, Askie L, Vandermeer B, et al. Standard 4: determining adequate sample sizes. *Pediatrics* 2012;129(Suppl 3):S138-45.
8. Williams K, Thomson D, Seto I, et al. Standard 6: age groups for pediatric trials. *Pediatrics* 2012;129(Suppl 3):S153-60.
9. Gates A, Hartling L, Vandermeer B, et al. The conduct and reporting of child health research: an analysis of randomized controlled trials published in 2012 and evaluation of change over 5 years. *J Pediatr* 2018;193:237-44.
10. Joseph PD, Craig JC, Caldwell PH. Clinical trials in children. *Br J Clin Pharmacol* 2015;79(3):357-69.
11. Graham A, Powell M, Taylor N, et al. Ethical research involving children: putting the evidence into practice. *Family Matters* 2015;96:23-8.
12. Ioannidis JP, Greenland S, Hlatky MA, et al. Increasing value and reducing waste in research design, conduct, and analysis. *Lancet* 2014;383:166-75.
13. Glasziou P, Altman DG, Bossuyt P, et al. Reducing waste from incomplete or unusable reports of biomedical research. *Lancet* 2014;383:267-76.
14. Nayak BK. Understanding the relevance of sample size calculation. *Indian J Ophthalmol* 2010;58:469.

15. Hamm MP, Hartling L, Milne A, et al. A descriptive analysis of a representative sample of pediatric randomized controlled trials published in 2007. *BMC Pediatr* 2010;10:96.
16. Cochrane. Cochrane Central Register of Controlled Trials (CENTRAL). London, United Kingdom: Cochrane. c1999-2018. Available from: <http://www.cochranelibrary.com/about/central-landing-page.html>. Accessed 5 September 2018.
17. Harris PA, Taylor R, Thielke R, et al. Research electronic data capture (REDCap)--a metadata-driven methodology and workflow process for providing translational research informatics support. *J Biomed Inform* 2009;42:377-81.
18. World Health Organization. Classifications. International Classification of Diseases (ICD). ICD-10 online versions. Geneva, Switzerland: World Health Organization. 2018. Available from: <http://www.who.int/classifications/icd/icdonlineversions/en/>. Accessed 5 September 2018.
19. International Monetary Fund. World Economic and Financial Surveys. World Economic Outlook. Database-WEO Groups and Aggregates Information. Washington, District of Columbia: International Monetary Fund. 2013. Available from: <http://www.imf.org/external/pubs/ft/weo/2013/02/weodata/groups.htm>. Accessed 5 September 2018.
20. Kaur G, Smyth RL, Williamson P. Developing a survey of barriers and facilitators to recruitment in randomized controlled trials. *Trials* 2012;13:218.
21. General Assembly of the World Medical Association. World Medical Association Declaration of Helsinki: ethical principles for medical research involving human subjects. *JAMA* 2013;310:2191-4.
22. Leibson T, Koren G. Informed consent in pediatric research. *Paediatr Drugs* 2015;17:5-11.
23. Saint-Raymond A, Hill S, Martines J, et al. CONSORT 2010. *Lancet* 2010;376(9737):229-30.
24. Tait AR, Geisser ME. Development of a consensus operational definition of child assent for research. *BMC Med Ethics* 2017;18:41.
25. Shaddy RE, Denne SC, The Committee on Drugs and Committee on Pediatric Research. Guidelines for the ethical conduct of studies to evaluate drugs in pediatric populations. *Pediatrics* 2010;125:850-60. Reaffirmed January 2014; 133:e1479.
26. Lepola P, Needham A, Mendum J, et al. Informed consent for paediatric clinical trials in Europe. *Arch Dis Child*. 2016;101:1017-25.
27. Canadian Paediatric Society. Ethical issues in health research in children. *Paediatr Child Health* 2008;13:707-20.

- 1
- 2
- 3 28. Chan A-W, Tetzlaff JM, Altman DG, et al. SPIRIT 2013 statement: defining standard protocol items
- 4 for clinical trials. *Ann Intern Med* 2013;158:200-7.
- 5
- 6 29. Schulz KF, Altman DG, Moher D. CONSORT 2010 statement: updated guidelines for reporting parallel
- 7 group randomised trials. *Trials* 2010;11:32.
- 8
- 9
- 10 30. Clyburne-Sherin AVP, Thurairajah P, Kapadia MZ, et al. Recommendations and evidence for
- 11 reporting items in pediatric clinical trial protocols and reports: two systematic reviews. *Trials*
- 12 2015;16:417.
- 13
- 14
- 15 31. Tromp K, Zwaan CM, van de Vathorst S. Motivations of children and their parents to participate in
- 16 drug research: a systematic review. *Eur J Pediatr* 2016;175:599-12.
- 17
- 18 32. Tait AR, Voepel-Lewis T, Zikmund-Fisher BJ, et al. Presenting research risks and benefits to parents:
- 19 does format matter? *Anesth Analg* 2010;111:718-23.
- 20
- 21 33. Kim SY, Miller FG. Informed consent for pragmatic trials: the integrated consent model. *NEJM*
- 22 2014;370:769-72.
- 23
- 24
- 25 34. St-Louis E, Oosenbrug M, Landry T, et al. Enrollment and reporting practices in pediatric general
- 26 surgical randomized clinical trials: a systematic review and observational analysis. *J Pediatr Surg*
- 27 2018;53:879-84.
- 28
- 29
- 30 35. Sully BG, Julious SA, Nicholl J. A reinvestigation of recruitment to randomised, controlled,
- 31 multicenter trials: a review of trials funded by two UK funding agencies. *Trials* 2013;14:166.
- 32
- 33 36. Salman RA-S, Beller E, Kagan J, Hemminki E, et al. Increasing value and reducing waste in biomedical
- 34 research regulation and management. *Lancet* 2014;383:176-85.
- 35
- 36
- 37
- 38
- 39
- 40
- 41
- 42
- 43
- 44
- 45
- 46
- 47
- 48
- 49
- 50
- 51
- 52
- 53
- 54
- 55
- 56
- 57
- 58
- 59
- 60

## Supplementary File 1. Search Strategy

## Summary of Search

| Database                                               | Date Searched    | Number Retrieved | After Duplicate Removal |
|--------------------------------------------------------|------------------|------------------|-------------------------|
| Cochrane Central Register of Controlled Trials (Wiley) | November 4, 2013 | 2343             | 2296                    |
| <b>Total</b>                                           |                  | <b>2343</b>      | <b>2296</b>             |

Database: Cochrane Central Register of Controlled Trials (Wiley)

Date Searched: 4 November 2013 at 21:07:57.057

Results: 2343 records (2296 following duplicate removal)

Search Strategy:

#1 (Infant\* or infancy or Newborn\* or Baby\* or Babies or Neonat\* or Preterm\* or Prematur\* or Postmatur\* or Child\* or Schoolchild\* or School age\* or Preschool\* or Kid or kids or Toddler\* or Teen\* or Boy\* or Girl\* or Minors\* or Pubert\* or Pubescen\* or Prepubescen\* or Pediatric\* or Paediatric\* or Peadiatric\* or Nursery school\* or Kindergar\* or Primary school\* or Secondary school\* or Elementary school\* or High school\* or Highschool\*):ti,ab,kw

#2 (Adolesc\*):ti,ab

#3 (Infant or Child or Minors or Puberty or Pediatrics or Schools):kw

#4 #1 or #2 or #3

#5 adolescent\*:kw

#6 (adolescent\* and (adult\* or elderly or "middle aged" or "aged, 80 and over")):kw

#7 #6 and not #4

#8 #4 or #5

#9 #8 and not #7 from 2012 to 2012, in Trials

## Supplementary File 2. Data Extraction Guide

| Field                                                              | Response                                                                                                                                                                                             | Comments                                                                                                                                                                                                                                                                                                                                                                                                                                                                                                                                                                                                                                                                                                                                                                                                                                                                            |
|--------------------------------------------------------------------|------------------------------------------------------------------------------------------------------------------------------------------------------------------------------------------------------|-------------------------------------------------------------------------------------------------------------------------------------------------------------------------------------------------------------------------------------------------------------------------------------------------------------------------------------------------------------------------------------------------------------------------------------------------------------------------------------------------------------------------------------------------------------------------------------------------------------------------------------------------------------------------------------------------------------------------------------------------------------------------------------------------------------------------------------------------------------------------------------|
| Trial conduct                                                      |                                                                                                                                                                                                      |                                                                                                                                                                                                                                                                                                                                                                                                                                                                                                                                                                                                                                                                                                                                                                                                                                                                                     |
| Where were participants recruited from?                            | <input type="checkbox"/> Established market economy<br><input type="checkbox"/> Transitional country<br><input type="checkbox"/> Developing country                                                  | Select all that apply.<br><b>Established market economy:</b> United States, Canada, Australia, New Zealand, Israel, Japan, Western European countries<br><b>Transitional country:</b> Eastern European countries: Albania, Bosnia and Herzegovina, Bulgaria, Croatia, Hungary, Kosovo, Latvia, Lithuania, FYR Macedonia, Montenegro, Poland, Romania, Serbia, Turkey<br><b>Developing country:</b> All others<br><br><i>(Panagiotou BMJ 2013; International Monetary Fund <a href="http://www.imf.org/external/pubs/ft/weo/2013/02/weodata/groups.htm">http://www.imf.org/external/pubs/ft/weo/2013/02/weodata/groups.htm</a>)</i>                                                                                                                                                                                                                                                  |
| What recruitment strategies were used?                             | <input type="checkbox"/> Standard<br><input type="checkbox"/> Not standard                                                                                                                           | <b>Standard:</b> Participants provide consent and then are randomized in a typical 1:1, 1:2, etc. manner.<br><b>Not standard:</b> Any of: <ul style="list-style-type: none"> <li>– Open trial design (randomization occurs before participants are approached, so that participants are informed of the treatment they were randomized to receive prior to consent)</li> <li>– Increasing or decreasing the chance of receiving the experimental treatment</li> <li>– Experimental treatment for all participants and standard treatment for non-participants</li> <li>– Standard care for all participants and experimental treatment for non-participants</li> <li>– Random assignment of treatment for participants and choice of treatment for non-participants</li> <li>– Opt in or opt out recruitment (consent was sought for participation or non-participation)</li> </ul> |
| Who first approached the patient about participating in the trial? | <input type="checkbox"/> Child's clinician<br><input type="checkbox"/> Researcher/clinician unknown to patient<br><input type="checkbox"/> Other (specify):<br><input type="checkbox"/> Not reported | Other professionals could include individuals such as teachers.                                                                                                                                                                                                                                                                                                                                                                                                                                                                                                                                                                                                                                                                                                                                                                                                                     |
| How did the family first hear about the trial?                     | <input type="checkbox"/> Approached during healthcare visit                                                                                                                                          | Select all that apply.                                                                                                                                                                                                                                                                                                                                                                                                                                                                                                                                                                                                                                                                                                                                                                                                                                                              |

## Supplementary File 2. Data Extraction Guide

|                                                     |                                                                                                                                                                                                                                                                                                                                                  |                                                                                                                                                                                                                                                                                                                                                                                                                               |
|-----------------------------------------------------|--------------------------------------------------------------------------------------------------------------------------------------------------------------------------------------------------------------------------------------------------------------------------------------------------------------------------------------------------|-------------------------------------------------------------------------------------------------------------------------------------------------------------------------------------------------------------------------------------------------------------------------------------------------------------------------------------------------------------------------------------------------------------------------------|
|                                                     | <input type="checkbox"/> Generalized mailing<br><input type="checkbox"/> Targeted mailing<br><input type="checkbox"/> Personalized mailing<br><input type="checkbox"/> Phone calls<br><input type="checkbox"/> Media<br><input type="checkbox"/> Pamphlets<br><input type="checkbox"/> Not reported<br><input type="checkbox"/> Other (specify): | <b>Generalized mailing:</b> mail out to a large population<br><b>Targeted mailing:</b> mail out to a targeted group<br><b>Personalized mailing:</b> mailing addressed to the individual<br><b>Media:</b> Internet, newspaper, radio, TV<br><b>Pamphlets:</b> given to the families or left out for participants to pick up                                                                                                    |
| Who was the trial information targeted to?          | <input type="checkbox"/> Parents<br><input type="checkbox"/> Children<br><input type="checkbox"/> Both<br><input type="checkbox"/> Not reported                                                                                                                                                                                                  | “Trial information” refers to recruitment materials.                                                                                                                                                                                                                                                                                                                                                                          |
| Did the authors report that consent was obtained?   | <input type="checkbox"/> Yes<br><input type="checkbox"/> No                                                                                                                                                                                                                                                                                      |                                                                                                                                                                                                                                                                                                                                                                                                                               |
| If yes, who obtained consent from the participants? | <input type="checkbox"/> Child’s clinician<br><input type="checkbox"/> Researcher/clinician unknown to patient<br><input type="checkbox"/> Other (specify):<br><input type="checkbox"/> Not reported                                                                                                                                             | Other professionals could include individuals such as teachers.                                                                                                                                                                                                                                                                                                                                                               |
| If yes, how was consent provided in the study?      | <input type="checkbox"/> Parental permission<br><input type="checkbox"/> Parental permission and participant assent<br><input type="checkbox"/> Consent of a mature minor<br><input type="checkbox"/> N/A                                                                                                                                        | Can assume parental consent if consent reported but not specified, and no other indication that another model was used.                                                                                                                                                                                                                                                                                                       |
| Were any incentives used in the study?              | <input type="checkbox"/> Yes<br><input type="checkbox"/> No<br><input type="checkbox"/> Not reported                                                                                                                                                                                                                                             |                                                                                                                                                                                                                                                                                                                                                                                                                               |
| If yes, what incentives were used?                  | <input type="checkbox"/> Reimbursement<br><input type="checkbox"/> Parents<br><input type="checkbox"/> Child<br><input type="checkbox"/> Families (no other detail)<br><input type="checkbox"/> Not reported<br><input type="checkbox"/> Compensation<br><input type="checkbox"/> Parents<br><input type="checkbox"/> Child                      | Select all that apply.<br><br><b>Reimbursement:</b> costs associated with participation in the study (e.g., travel, parking) are paid back.<br><b>Compensation:</b> participants are paid a modest amount for their time/effort.<br><b>Appreciation:</b> a small token gift given at the end of the study, usually not known beforehand.<br><b>Payment:</b> typically known before study participation and used as a strategy |

Supplementary File 2. Data Extraction Guide

1  
2  
3  
4  
5  
6  
7  
8  
9  
10  
11  
12  
13  
14  
15  
16  
17  
18  
19  
20  
21  
22  
23  
24  
25  
26  
27  
28  
29  
30  
31  
32  
33  
34  
35  
36  
37  
38  
39  
40  
41  
42  
43  
44  
45  
46  
47

|                                                                                                   |                                                                                                                                                                                                                                                                                                                                                                                                                                                                                                                                                       |                                                                                                                                                                                                                                                                                                                                                                                                                                                                                                                                                                                                  |
|---------------------------------------------------------------------------------------------------|-------------------------------------------------------------------------------------------------------------------------------------------------------------------------------------------------------------------------------------------------------------------------------------------------------------------------------------------------------------------------------------------------------------------------------------------------------------------------------------------------------------------------------------------------------|--------------------------------------------------------------------------------------------------------------------------------------------------------------------------------------------------------------------------------------------------------------------------------------------------------------------------------------------------------------------------------------------------------------------------------------------------------------------------------------------------------------------------------------------------------------------------------------------------|
|                                                                                                   | <input type="checkbox"/> Families (no other detail)<br><input type="checkbox"/> Not reported<br><input type="checkbox"/> Appreciation<br><input type="checkbox"/> Parents<br><input type="checkbox"/> Child<br><input type="checkbox"/> Families (no other detail)<br><input type="checkbox"/> Not reported<br><input type="checkbox"/> Payment<br><input type="checkbox"/> Parents<br><input type="checkbox"/> Child<br><input type="checkbox"/> Families (no other detail)<br><input type="checkbox"/> Not reported<br><input type="checkbox"/> N/A | <p>to enhance recruitment.</p> <p>*Use “families” only if specified as such in the publication, with no information provided on whether the incentives were meant for the parents or child.</p>                                                                                                                                                                                                                                                                                                                                                                                                  |
| How long were participants given to decide whether or not to enroll in the trial?                 | <input type="checkbox"/> No restriction<br><input type="checkbox"/> Limited<br><input type="checkbox"/> No time<br><input type="checkbox"/> Not reported                                                                                                                                                                                                                                                                                                                                                                                              | <p><b>No restriction:</b> hours to weeks<br/> <b>Limited:</b> immediately to less than a few hours<br/> <b>No time:</b> retrospective consent</p>                                                                                                                                                                                                                                                                                                                                                                                                                                                |
| Were any delays, shortfalls, or difficulties in recruitment reported once the trial was underway? | <input type="checkbox"/> Yes<br><input type="checkbox"/> No                                                                                                                                                                                                                                                                                                                                                                                                                                                                                           |                                                                                                                                                                                                                                                                                                                                                                                                                                                                                                                                                                                                  |
| If yes, what were the reasons for the delays or difficulties?                                     | <input type="checkbox"/> Trial level factors<br><input type="checkbox"/> Site level factors<br><input type="checkbox"/> Patient level factors<br><input type="checkbox"/> Clinical team level factors<br><input type="checkbox"/> Information and consent factors<br><input type="checkbox"/> Study team level factors<br><input type="checkbox"/> Other (specify):<br><input type="checkbox"/> N/A                                                                                                                                                   | <p>Examples (for more detail, see <i>Kaur Trials 2012</i>):</p> <p><b>Trial level:</b> funding, trial management, feasibility<br/> <b>Site level:</b> competing projects, time to open up site<br/> <b>Patient level:</b> travel, costs, duration of trial and follow-up, preferences, language or cultural barrier<br/> <b>Information and consent:</b> amount and complexity of trial information provided, experience of clinical team seeking consent<br/> <b>Study team level:</b> experience and training of team, clinical workload, clinician attitude towards research or treatment</p> |
| How were the recruitment delays or difficulties addressed?                                        | <input type="checkbox"/> Described (specify):<br><input type="checkbox"/> Not described<br><input type="checkbox"/> No difficulties                                                                                                                                                                                                                                                                                                                                                                                                                   |                                                                                                                                                                                                                                                                                                                                                                                                                                                                                                                                                                                                  |
| Was the use of patient or family involvement in the                                               | <input type="checkbox"/> Yes (specify):<br><input type="checkbox"/> No                                                                                                                                                                                                                                                                                                                                                                                                                                                                                | <p>For involvement in the <b>conduct</b> of the study, consider involvement past the point where a decision is made to participate, i.e., the participant/family has</p>                                                                                                                                                                                                                                                                                                                                                                                                                         |

## Supplementary File 2. Data Extraction Guide

|                                                             |                                                                                                                                                                                                                                                                                                                                                                                                                                                                                                                                                                                                                                                                                                                                                                                                                                                                                                                                                 |                                                                                                                                                                                                                                                                                                             |
|-------------------------------------------------------------|-------------------------------------------------------------------------------------------------------------------------------------------------------------------------------------------------------------------------------------------------------------------------------------------------------------------------------------------------------------------------------------------------------------------------------------------------------------------------------------------------------------------------------------------------------------------------------------------------------------------------------------------------------------------------------------------------------------------------------------------------------------------------------------------------------------------------------------------------------------------------------------------------------------------------------------------------|-------------------------------------------------------------------------------------------------------------------------------------------------------------------------------------------------------------------------------------------------------------------------------------------------------------|
| design or conduct of the study reported?                    |                                                                                                                                                                                                                                                                                                                                                                                                                                                                                                                                                                                                                                                                                                                                                                                                                                                                                                                                                 | already enrolled prior to the involvement referred to.                                                                                                                                                                                                                                                      |
| How was the study population selected?                      | <input type="checkbox"/> Inpatients<br><input type="checkbox"/> NICU<br><input type="checkbox"/> PICU<br><input type="checkbox"/> Not reported<br><input type="checkbox"/> Other (specify):<br><input type="checkbox"/> Outpatients<br><input type="checkbox"/> Clinicians' office<br><input type="checkbox"/> School<br><input type="checkbox"/> Community<br><input type="checkbox"/> Unclear<br><input type="checkbox"/> Other (specify):                                                                                                                                                                                                                                                                                                                                                                                                                                                                                                    | Select all that apply.<br><br>In the case of selection from a dental clinic, report "Doctor's office."                                                                                                                                                                                                      |
| What primary diagnostic category was involved in the study? | <input type="checkbox"/> Infectious and parasitic diseases<br><input type="checkbox"/> Neoplasms<br><input type="checkbox"/> Blood, blood forming organs, and immune mechanism<br><input type="checkbox"/> Endocrine, nutritional, and metabolic diseases<br><input type="checkbox"/> Mental and behavioural disorders<br><input type="checkbox"/> Nervous system<br><input type="checkbox"/> Eye and adnexa<br><input type="checkbox"/> Ear and mastoid process<br><input type="checkbox"/> Circulatory system<br><input type="checkbox"/> Respiratory system<br><input type="checkbox"/> Digestive system<br><input type="checkbox"/> Skin and subcutaneous tissue<br><input type="checkbox"/> Musculoskeletal system and connective tissue<br><input type="checkbox"/> Genitourinary system<br><input type="checkbox"/> Pregnancy, childbirth, and the puerperium<br><input type="checkbox"/> Conditions originating in the perinatal period | Select the primary diagnostic category of the study using the ICD-10 classification system.<br><br><div style="text-align: right;"> <i>(ICD-10 Version:2010</i><br/> <a href="http://apps.who.int/classifications/icd10/browse/2010/en">http://apps.who.int/classifications/icd10/browse/2010/en</a> </div> |



Supplementary File 2. Data Extraction Guide

|                                                                                                                                                                |                                                                                                                                                                                                                                                                                                                                                                                                                                                                                                                                                                   |                                                                                                                                                                                                                     |
|----------------------------------------------------------------------------------------------------------------------------------------------------------------|-------------------------------------------------------------------------------------------------------------------------------------------------------------------------------------------------------------------------------------------------------------------------------------------------------------------------------------------------------------------------------------------------------------------------------------------------------------------------------------------------------------------------------------------------------------------|---------------------------------------------------------------------------------------------------------------------------------------------------------------------------------------------------------------------|
|                                                                                                                                                                | <input type="checkbox"/> Congenital malformations, deformations, and chromosomal abnormalities<br><input type="checkbox"/> Symptoms, signs, and abnormal clinical and laboratory findings, not elsewhere classified<br><input type="checkbox"/> Injury, poisoning, and consequences of external causes<br><input type="checkbox"/> External causes of morbidity and mortality<br><input type="checkbox"/> Factors influencing health status and contact with health services<br><input type="checkbox"/> Oral health<br><input type="checkbox"/> Other (specify): |                                                                                                                                                                                                                     |
| Did the study exclude participants who had at least one chronic condition (other than the condition that was the focus of the trial) or a co-morbid condition? | <input type="checkbox"/> Yes<br><input type="checkbox"/> No<br><input type="checkbox"/> Unclear                                                                                                                                                                                                                                                                                                                                                                                                                                                                   |                                                                                                                                                                                                                     |
| Sample size                                                                                                                                                    |                                                                                                                                                                                                                                                                                                                                                                                                                                                                                                                                                                   |                                                                                                                                                                                                                     |
| How many patients were approached to participate in the study?                                                                                                 |                                                                                                                                                                                                                                                                                                                                                                                                                                                                                                                                                                   | Use NR if applicable.                                                                                                                                                                                               |
| How many patients consented to participate in the study?                                                                                                       |                                                                                                                                                                                                                                                                                                                                                                                                                                                                                                                                                                   | Use NR if applicable.<br>*This is not necessarily the same number as randomized.                                                                                                                                    |
| How many participants were randomized?                                                                                                                         |                                                                                                                                                                                                                                                                                                                                                                                                                                                                                                                                                                   | Total study n.                                                                                                                                                                                                      |
| How many participants were analyzed?                                                                                                                           |                                                                                                                                                                                                                                                                                                                                                                                                                                                                                                                                                                   | Total study n.<br>If the numbers differ for different outcomes or time points, report the number of participants analyzed for the primary outcome. If not specified, use the <b>time of the first measurement</b> . |

Supplementary File 2. Data Extraction Guide

1  
2  
3  
4  
5  
6  
7  
8  
9  
10  
11  
12  
13  
14  
15  
16  
17  
18  
19  
20  
21  
22  
23  
24  
25  
26  
27  
28  
29  
30  
31  
32  
33  
34  
35  
36  
37  
38  
39  
40  
41  
42  
43  
44  
45  
46  
47

|                                              |                                                             |  |
|----------------------------------------------|-------------------------------------------------------------|--|
| Was a sample size calculation reported?      | <input type="checkbox"/> Yes<br><input type="checkbox"/> No |  |
| If yes, what was the calculated sample size? |                                                             |  |

Confidential: For Review Only

# BMJ Paediatrics Open

## Consent and recruitment in pediatric research: an evaluation of trials published in 2012

|                               |                                                                                                                                                                                                                                                                                                                                                                                                                                                                                                                                                                                                                                                                                                                                                                                                                                                            |
|-------------------------------|------------------------------------------------------------------------------------------------------------------------------------------------------------------------------------------------------------------------------------------------------------------------------------------------------------------------------------------------------------------------------------------------------------------------------------------------------------------------------------------------------------------------------------------------------------------------------------------------------------------------------------------------------------------------------------------------------------------------------------------------------------------------------------------------------------------------------------------------------------|
| Journal:                      | <i>BMJ Paediatrics Open</i>                                                                                                                                                                                                                                                                                                                                                                                                                                                                                                                                                                                                                                                                                                                                                                                                                                |
| Manuscript ID                 | bmjpo-2018-000369.R1                                                                                                                                                                                                                                                                                                                                                                                                                                                                                                                                                                                                                                                                                                                                                                                                                                       |
| Article Type:                 | Original article                                                                                                                                                                                                                                                                                                                                                                                                                                                                                                                                                                                                                                                                                                                                                                                                                                           |
| Date Submitted by the Author: | 18-Sep-2018                                                                                                                                                                                                                                                                                                                                                                                                                                                                                                                                                                                                                                                                                                                                                                                                                                                |
| Complete List of Authors:     | Gates, Allison; University of Alberta, Pediatrics<br>Caldwell, Patrina; University of Sydney, Discipline of Child and Adolescent Health and Centre for Kidney Research<br>Curtis, Sarah; University of Alberta, Department of Pediatrics<br>Dans, Leonila; University of the Philippines<br>Fernandes, Ricardo; Universidade de Lisboa, Faculdade de Medicina; Centro Hospitalar Lisboa Norte EPE, Department of Pediatrics<br>Hartling, Lisa; University of Alberta, Department of Pediatrics<br>Kelly, Lauren; University of Manitoba, Department of Pediatrics and Child Health; George and Fay Yee Centre for Healthcare Innovation, Clinical Trials Platform<br>Williams, Katrina; Royal Children's Hospital Melbourne; University of Melbourne<br>Woolfall, Kerry; Univ Liverpool<br>Dyson, Michele; University of Alberta, Department of Pediatrics |
| Keywords:                     | Data Collection, General Paediatrics                                                                                                                                                                                                                                                                                                                                                                                                                                                                                                                                                                                                                                                                                                                                                                                                                       |
|                               |                                                                                                                                                                                                                                                                                                                                                                                                                                                                                                                                                                                                                                                                                                                                                                                                                                                            |

SCHOLARONE™  
Manuscripts

1  
2  
3 **Title:** Consent and recruitment in pediatric research: an evaluation of trials published in 2012

4  
5 **Authors:** Allison Gates, PhD<sup>a,b</sup>, Patrina Caldwell, PhD<sup>c</sup>, Sarah Curtis, MD<sup>b</sup>, Leonila Dans, MD<sup>d</sup>, Ricardo M  
6  
7 Fernandes, MD, PhD<sup>e,f</sup>, Lisa Hartling, PhD<sup>a,b</sup>, Lauren E Kelly, PhD<sup>g,h</sup>, Katrina Williams, PhD<sup>i,j,k</sup>, Kerry  
8  
9 Woolfall, PhD<sup>l</sup>, Michele P Dyson, PhD<sup>a,b</sup>

10  
11 **Affiliations:** <sup>a</sup>Alberta Research Centre for Health Evidence, University of Alberta, Edmonton, Canada;  
12  
13 <sup>b</sup>Department of Pediatrics, University of Alberta, Edmonton, Canada; <sup>c</sup>Discipline of Child and Adolescent  
14  
15 Health and Centre for Kidney Research, The University of Sydney, Sydney, Australia; <sup>d</sup>University of the  
16  
17 Phillippines, Manila, Philippines; <sup>e</sup>Instituto de Medicina Molecular, Faculdade de Medicina, Universidade  
18  
19 de Lisboa, Portugal; <sup>f</sup>Department of Pediatrics, Hospital de Santa Maria, Centro Hospitalar Lisboa Norte,  
20  
21 Portugal; <sup>g</sup>Department of Pediatrics and Child Health, University of Manitoba, Winnipeg, Canada;  
22  
23 <sup>h</sup>Clinical Trials Platform, George and Fay Yee Centre for Healthcare Innovation, Winnipeg, Canada; <sup>i</sup>Royal  
24  
25 Children's Hospital, Melbourne, Australia; <sup>j</sup>University of Melbourne, Melbourne, Australia; <sup>k</sup>Murdoch  
26  
27 Childrens Research Institute, Melbourne, Australia; and <sup>l</sup>Institute of Psychology, Health and Society,  
28  
29 University of Liverpool, Liverpool, United Kingdom

30  
31 **Address correspondence to:** Dr. Allison Gates, Department of Pediatrics, University of Alberta, ECHA 4-  
32  
33 482C, 11405 87 Ave NW, Edmonton, Alberta, Canada T6G 1C9, agates1@ualberta.ca, Phone: +1-780-  
34  
35 492-8252, Fax: +1-780-248-5627.

36  
37 **Word count:** 2496 words

38  
39 **Key words:** pediatrics; medicine; clinical studies; study design

**ABSTRACT**

**Objectives.** We evaluated 300 pediatric trials to determine: the consent and recruitment strategies used; how trial information was presented to families; how incentives were used; and if they achieved their recruitment targets.

**Methods.** For this cross-sectional evaluation, we searched the Cochrane Central Register of Controlled trials for pediatric trials published in 2012 and randomly selected 300 that reported on outcomes for participants aged  $\leq 21$  years. We collected data on consent and recruitment procedures for each trial and undertook descriptive analyses in SPSS Statistics.

**Results.** All but one trial (99.7%) used a standard recruitment strategy. Most (92%) trials reported that consent was obtained but only 13% reported who obtained consent. Two-thirds (65%) of trials included school-aged participants, and of these 68% reported obtaining assent. Half (50%) of the trials reported who the trial information was targeted to. Most trials (75%) of school-aged participants targeted information toward children or children and their parents. Fourteen percent of trials reported using incentives, half (50%) of which were in the form of compensation. Only 48% of trials reported sufficient data to determine if their recruitment targets were achieved. Of these, 70% achieved their targets.

**Conclusions.** Notable reporting shortcomings included: how families were recruited into the trial; who obtained consent and/or assent and how; who trial information was directed to; whether incentives were used; and sufficient data to determine if the recruitment target was achieved. Forthcoming pediatric-specific reporting standards may improve reporting in this priority area. Our data provide a baseline for ongoing monitoring of the state of the research.

**WHAT IS KNOWN ABOUT THE SUBJECT**

- In 2012, Standards for Research in (StaR) Child Health published evidence-based guidance to inform ethically-sound recruitment and consent in pediatric trials, and identified knowledge gaps.
- To optimize the value of children’s participation in research, trialists must safeguard them from avoidable harm, use rigorous methodologies, and report their findings transparently.

**WHAT THIS STUDY ADDS**

- Reporting shortcomings included: how families were recruited; who obtained consent/assent; who trial information was directed to; whether incentives were used; if recruitment targets were reached.
- The data from this study will serve as a baseline for ongoing monitoring and evaluation of the state of the research.

## INTRODUCTION

In 2012, Standards for Research in (StaR) Child Health published six evidence-based Standards to guide the rigorous design, conduct, and reporting of pediatric trials.<sup>1, 2</sup> Each Standard<sup>3-8</sup> includes practice recommendations and a research agenda to address knowledge gaps. To characterize the state of the literature, we analyzed a random sample of 300 pediatric trials published in 2012<sup>9</sup> and identified various shortcomings in their conduct and reporting. Among other issues, most trials reported results that were at unclear or high risk of bias, and only 46% were registered in a clinical trial registry.<sup>9</sup>

Trialists are ethically obligated to optimize the value of children's participation in research by safeguarding them from avoidable harms,<sup>10, 11</sup> using rigorous methodologies,<sup>12</sup> and reporting their findings transparently.<sup>13</sup> Ethically-sound recruitment and consent procedures include: obtaining consent from parents and assent from children; approaching all eligible children, and providing families with age-appropriate trial information; ensuring that incentives do not influence children's decision-making; and clearly differentiating between elements of standard care and those that are part of the trial.<sup>3</sup> Safeguarding children from avoidable harm also includes carefully planned recruitment targets. Trials that recruit too many participants needlessly expose children to the burdens of research participation, while those that are underpowered to detect clinically meaningful effects contribute to research waste.<sup>14</sup>

In response to the knowledge gaps and priorities identified by the Consent and Recruitment Standard Development Group, we evaluated the consent and recruitment procedures for 300 pediatric trials to determine: the consent and recruitment strategies used; the formats used to present trial information to families; how incentives were used; and whether they achieved their recruitment targets.

## METHODS

### Context

The analyses presented herein are part of a larger study<sup>9, 15</sup> in which we characterized the conduct and reporting qualities of 300 pediatric trials published in 2012. A full description of the study methods appears in a previous publication.<sup>9</sup>

### Database search

1  
2  
3 In November 2013, we searched the Cochrane Central Register of Controlled Trials for randomized trials  
4 published in 2012 (Supplementary File 1). The Cochrane Central Register of Controlled Trials is a  
5 comprehensive database of reports of randomized and quasi-randomized trials, taken mainly from  
6 MEDLINE and Embase.<sup>16</sup> The 2012 publication date coincided with the publication of the StaR Child  
7 Health Standards.  
8  
9  
10

### 11 12 13 **Trial selection**

14 We identified 2296 unique records via the search. We ordered these randomly in Excel (v. 2016;  
15 Microsoft Corporation, Redmond, Washington) and selected the first 300 published trials that reported  
16 on outcomes specific to participants  $\leq 21$  years of age (mean age at baseline). The sample size coincides  
17 with our previous evaluation of pediatric trials published in 2007.<sup>15</sup> We did not restrict our sample by  
18 language, condition, intervention, or outcome type.  
19  
20  
21  
22  
23

### 24 25 **Data extraction**

26 For each included trial, we extracted data into REDCap (Research Electronic Data Capture)<sup>17</sup> pertaining  
27 to the characteristics of the: publication; trial design; intervention; trial conduct; trial sample; data  
28 monitoring committee and follow-up; outcomes and conclusions; risk of bias; and trial registration and  
29 protocol.<sup>9</sup> We also collected additional data to address the knowledge gaps and priorities outlined by  
30 the Standard Development Groups. An author (AG or MPD) verified the extracted data to identify errors  
31 or omissions.  
32  
33  
34  
35  
36  
37

38 Our data extraction guide for the variables included in this report is in Supplementary File 2. We  
39 classified the primary diagnostic category according to the World Health Organization's International  
40 Statistical Classification of Diseases and Related Health Problems 10<sup>th</sup> Revision.<sup>18</sup> We classified  
41 participants' recruitment location according to the World Bank income classification for the 2019 fiscal  
42 year.<sup>19</sup> We classified the recruitment strategy as standard if the participants provided consent and were  
43 then randomized in a typical manner (e.g., 1:1, 1:2). We classified the reasons for recruitment delays  
44 based on the definitions provided by Kaur et al.<sup>20</sup> We categorized incentives as one or more of the  
45 following: reimbursements (costs associated with participation that are paid back, e.g., parking, travel);  
46 compensation (participants are paid a modest amount for their time and effort); tokens of appreciation  
47 (a small gift given at the end of the trial, usually not known beforehand); and incentive payments  
48 (typically known before participation and used to enhance recruitment).  
49  
50  
51  
52  
53  
54  
55  
56  
57  
58  
59  
60



1  
2  
3  
4  
5 We referred to protocols, trial registries, and associated publications to complement data extraction.  
6 We searched for trial registers in the International Clinical Trials Registry Platform, the ISRCTN Registry,  
7 and via Google. We located trial registers for 46% (n = 138/300) of the trials.<sup>9</sup> We used protocols or  
8 companion articles only when cited in the publications. We did not contact authors to collect consent  
9 and recruitment details beyond those in published reports.  
10  
11  
12

### 13 14 15 **Data analysis**

16 We exported the data to an Excel workbook for cleaning and to SPSS Statistics (v. 23; IBM Corporation,  
17 Armonk, New York) for descriptive analysis. We determined whether the recruitment target was  
18 reached by comparing the result of the sample size calculation to the number of participants enrolled in  
19 the trial.  
20  
21  
22

## 23 24 25 **RESULTS**

### 26 27 **Patient population and consent and recruitment procedures**

28 Most trials recruited from high income countries<sup>19</sup> (n = 202/300, 67%) and 68% (n = 205/300) reported  
29 excluding patients with co-morbid or chronic diseases (Table 1). Only one trial (n = 1/300, 0.3%)  
30 reported using a non-standard recruitment strategy (Zelen's design). Only one trial (n = 1/300, 0.3%)  
31 reported a specified amount of time (seven days) for participants to decide whether to enroll.  
32 Seventeen percent (n = 51/300) of trials reported who first spoke to the family about participating. The  
33 most common point of contact was a researcher or clinician unknown to the participant (n = 28/51,  
34 55%).  
35  
36  
37  
38  
39  
40

41  
42 Most trials reported that consent was obtained (n = 275/300, 92%), but only 13% (n = 39/300) reported  
43 who obtained consent. Ninety percent (n = 270/300) of trials reported how consent was provided.  
44 Among these, 55% (n = 149/270) obtained consent via parental permission and 43% (n = 117/270) via  
45 parental permission combined with participant assent. Four trials (2%) reported only obtaining the  
46 consent of a mature minor. These included trials of the following: corrective exercises for scoliosis;  
47 prevention of acute knee injuries in athletes; bright-light therapy for non-seasonal depression; and  
48 oxidant and antioxidant levels in patients with orthodontic tooth movement. Of trials that included  
49 school-aged participants (>5 years old; n = 196/300, 65%), 68% (n = 117/172) reported obtaining  
50 participant assent and 32% (n = 55/172) reported obtaining parental permission only. Three percent (n =  
51  
52  
53  
54  
55  
56  
57  
58  
59  
60

9/300) of trials reported that participants and families were involved in the design or conduct of the trial.

Nineteen percent (n = 56/300) of trials did not report the recruitment setting (or it was unclear). When clearly reported, most often trials recruited participants from inpatient populations (n = 74/300, 25%), outpatient populations (n = 51/300, 17%), or schools (n = 70/300, 23%).

**Table 1.** Characteristics of the patient populations and recruitment approaches (N = 300)

| Characteristic                                                        | n (%)      |
|-----------------------------------------------------------------------|------------|
| <b>Recruitment location*</b>                                          |            |
| Low income country                                                    | 16 (5.3)   |
| Lower middle income country                                           | 33 (11.0)  |
| Upper middle income country                                           | 56 (18.7)  |
| High income country                                                   | 202 (67.3) |
| <b>Primary diagnostic category**</b>                                  |            |
| Mental and behavioral disorders                                       | 50 (16.7)  |
| Infectious and parasitic disease                                      | 39 (13.0)  |
| Respiratory system                                                    | 30 (10.0)  |
| Conditions originating in the perinatal period                        | 28 (9.3)   |
| Endocrine, nutritional, and metabolic diseases                        | 25 (8.3)   |
| Oral health                                                           | 19 (6.3)   |
| Factors influencing health status and contact with health services    | 13 (4.3)   |
| Digestive system                                                      | 10 (3.3)   |
| Blood, blood forming organs, and immune mechanism                     | 7 (2.3)    |
| Congenital malformations, deformations, and chromosomal abnormalities | 7 (2.3)    |
| Nervous system                                                        | 7 (2.3)    |
| Eye and adnexa                                                        | 5 (1.7)    |
| Ear and mastoid process                                               | 4 (1.3)    |
| Injury, poisoning, and consequences of external causes                | 4 (1.3)    |
| Circulatory system                                                    | 3 (1.0)    |
| External causes of morbidity and mortality                            | 3 (1.0)    |
| Genitourinary system                                                  | 3 (1.0)    |
| Musculoskeletal system and connective tissue                          | 3 (1.0)    |
| Neoplasms                                                             | 3 (1.0)    |
| Pregnancy, childbirth, and the puerperium                             | 2 (0.7)    |
| Skin and subcutaneous tissue                                          | 2 (0.7)    |
| Other                                                                 | 33 (11.0)  |
| <b>Exclusion of patients with chronic diseases</b>                    |            |
| Yes                                                                   | 205 (68.3) |
| No                                                                    | 59 (19.7)  |
| Unclear                                                               | 36 (12.0)  |

|                                                           |            |
|-----------------------------------------------------------|------------|
| <b>Recruitment strategy</b>                               |            |
| Standard                                                  | 299 (99.7) |
| Not standard                                              | 1 (0.3)    |
| <b>Time to decide whether to enroll</b>                   |            |
| Limited                                                   | 1 (0.3)    |
| Not reported                                              | 299 (99.7) |
| <b>Who first approached the patient</b>                   |            |
| Child's clinician                                         | 8 (2.7)    |
| Researcher or clinician unknown to patient                | 28 (9.3)   |
| Other                                                     | 15 (5.0)   |
| Not reported                                              | 249 (83.0) |
| <b>Consent obtained and reported</b>                      |            |
| Yes                                                       | 275 (91.7) |
| No                                                        | 25 (8.3)   |
| <b>Who obtained consent</b>                               |            |
| Child's clinician                                         | 2 (0.7)    |
| Researcher or clinician unknown to patient                | 31 (10.3)  |
| Other                                                     | 6 (2.0)    |
| Not reported                                              | 261 (87.0) |
| <b>How consent was provided</b>                           |            |
| Parental permission                                       | 149 (49.7) |
| Parental permission and participant assent                | 117 (39.0) |
| Consent of a mature minor                                 | 4 (1.3)    |
| Not reported                                              | 30 (10.0)  |
| <b>Patients/families involved in trial design/conduct</b> |            |
| Reported                                                  | 9 (3.0)    |
| Not reported                                              | 291 (97.0) |
| <b>Source of recruitment***</b>                           |            |
| Inpatients                                                | 74 (24.7)  |
| Outpatients                                               | 51 (17.0)  |
| Clinician's office                                        | 38 (12.7)  |
| School                                                    | 70 (23.3)  |
| Community                                                 | 44 (14.7)  |
| Other                                                     | 14 (4.7)   |
| Unclear or not reported                                   | 56 (18.7)  |

\*Defined according to the World Bank income classification, 2019 fiscal year.<sup>19</sup> Some trials recruited from more than one category.

\*\*Defined according to the International Statistical Classification of Diseases and Related Health Problems 10<sup>th</sup> Revision (2010).<sup>18</sup> These data have been previously reported, but are shown here for context.<sup>9</sup>

\*\*\*Total exceeds 300 because some trials reported multiple sources.

### Formats used to present trial information to participants and families

About two-thirds (n = 184/300, 61%) of trials reported how families were informed about the opportunity to participate (Table 2). Of these, 59% (n = 108/184) reported that parents were

approached during a healthcare visit, 8% (n = 15/184) used mail invites, 4% (n = 7/184) approached parents by telephone, 14% (n = 26/184) used media messages (e.g., via the radio, newspaper, or a website), and 11% (n = 20/184) used pamphlets. Other methods (n = 63/184, 34%) included schools (i.e., school staff contacted parents about the trial), community contacts and word of mouth; and identifying potential participants through chart reviews or previous trials. Sixteen percent (n = 30/184) of trials used multiple means of informing families about the opportunity to participate.

Half (n = 151/300, 50%) of the trials reported the person who was the target of the trial information. Of these, 58% (n = 88/151) targeted the information toward parents, 37% (n = 56/151) toward parents and children, and 5% (n = 7/151) toward children only. Although it was not reported, we assumed that an additional 13% (n = 40/300) intended the information to be for parents, as participants were infants or children less than school age. When it was reported, all trials that included only participants ≤5 years of age directed the information to parents only (n = 64/64, 100%). Most trials (n = 65/87, 75%) that included participants >5 years of age directed trial information either to children or both parents and children. All of the trials (n = 5/5, 100%) in which information was directed specifically toward children were conducted in adolescents.

**Table 2.** Formats used to present trial information to participants and families (N = 300)

| Characteristic                               | n (%)      |
|----------------------------------------------|------------|
| <b>How the family heard about the trial*</b> |            |
| Approached during healthcare visit           | 108 (36.0) |
| Mailing                                      | 15 (5.0)   |
| Generalized mailing                          | 4 (1.3)    |
| Targeted mailing                             | 9 (3.0)    |
| Personalized mailing                         | 2 (0.7)    |
| Phone calls                                  | 7 (2.3)    |
| Media                                        | 26 (8.7)   |
| Pamphlets                                    | 20 (6.7)   |
| Other                                        | 63 (21.0)  |
| Not reported                                 | 116 (38.7) |
| <b>Who trial information was targeted to</b> |            |
| Parents                                      | 88 (29.3)  |
| Children                                     | 7 (2.3)    |
| Parents and children                         | 56 (18.7)  |
| Not reported                                 | 149 (49.7) |

\*Some trials used multiple approaches.

### Use of incentives

Most trials did not report whether incentives were used ( $n = 253/300$ , 84%) and five (2%) reported not using incentives. Fourteen percent ( $n = 42/300$ ) of trials reported using incentives. These were most often in the form of compensation ( $n = 21/42$ , 50%) and tokens of appreciation ( $n = 12/42$ , 29%) (five studies (12%) provided reimbursements and seven (17%) provided incentive payments). Reported compensation amounts varied, e.g., free dental care and \$20 for families participating in a 5-year dental amalgam trial; \$5 to \$10 gift cards for adolescents participating in a trial of telephone-based preventive health education and counseling. Tokens of appreciation also varied, e.g., an insecticide impregnated bed net and soap for families participating in a trial of therapeutic food for catch-up growth after malaria; \$40 for teachers participating in a trial of a school-based intervention. Tables 3 and 4 show the reported incentive use and types of incentives used stratified by continent of recruitment. The use of incentives was most often reported in studies that recruited from North America ( $n = 33/119$ , 28%). All studies that offered incentive payments recruited from North America.

The child was often the recipient of the incentive, rather than the parents or family: 20% ( $n = 1/5$ ) of reimbursements (e.g., \$5 for a bus ticket for travel), 48% ( $n = 10/21$ ) of compensation incentives (e.g., \$10 for completing a survey), 50% ( $n = 6/12$ ) of tokens of appreciation (e.g., \$10 gift certificate), and 83% ( $n = 5/6$ ) of incentive payments (e.g., \$50 supermarket gift cards) were intended for the participant.

**Table 3.** Use of incentives stratified by recruitment continent (N = 300)\*

| Recruitment continent | N   | Use of incentives, n (%) |         |              |
|-----------------------|-----|--------------------------|---------|--------------|
|                       |     | Yes                      | No      | Not reported |
| Africa                | 26  | 3 (11.5)                 | 1 (3.8) | 22 (84.6)    |
| Asia                  | 82  | 1 (1.2)                  | 2 (2.4) | 79 (96.3)    |
| Australia             | 18  | 3 (16.7)                 | 0 (0.0) | 15 (83.3)    |
| Europe                | 54  | 2 (3.7)                  | 3 (5.6) | 49 (90.7)    |
| North America         | 119 | 33 (27.7)                | 0 (0.0) | 86 (72.3)    |
| South America         | 9   | 0 (0.0)                  | 0 (0.0) | 9 (100.0)    |

\*Some studies recruited participants from more than one continent.

**Table 4.** Types of incentives used stratified by continent (N = 42)\*

| Recruitment continent | N  | Types of incentives used, n (%) |              |                        |          |
|-----------------------|----|---------------------------------|--------------|------------------------|----------|
|                       |    | Reimbursements                  | Compensation | Tokens of appreciation | Payments |
| Africa                | 3  | 1 (33.3)                        | 2 (66.7)     | 1 (33.3)               | 0 (0.0)  |
| Asia                  | 1  | 0 (0.0)                         | 0 (0.0)      | 1 (100.0)              | 0 (0.0)  |
| Australia             | 3  | 2 (66.7)                        | 1 (33.3)     | 0 (0.0)                | 0 (0.0)  |
| Europe                | 2  | 0 (0.0)                         | 2 (100.0)    | 0 (0.0)                | 0 (0.0)  |
| North America         | 33 | 2 (6.1)                         | 16 (48.5)    | 10 (30.3)              | 7 (21.2) |

|               |   |         |         |         |         |
|---------------|---|---------|---------|---------|---------|
| South America | 0 | 0 (0.0) | 0 (0.0) | 0 (0.0) | 0 (0.0) |
|---------------|---|---------|---------|---------|---------|

\*Some studies offered multiple types of incentives.

### Recruitment target attainment

About half (n = 145/300, 48%) of the trials reported sufficient information to determine if the recruitment target was achieved (Table 5). Of these, 70% (n = 102/145) recruited their target sample size. Recruitment delays were reported in 6% (n = 19/300) of trials, and were most often due to patient level (n = 10/19, 53%; e.g., travel, duration of trial, preferences) or trial level factors (n = 9/19, 47%; e.g., funding, trial management, feasibility). Strategies to address recruitment delays included stopping the trial before the recruitment target was achieved (n = 13/19, 68%), extending the recruitment period (n = 3/19, 16%), adding trial sites (n = 2/19, 11%), modifying the eligibility criteria (n = 3/19, 16%), and modifying the incentives (n = 1/19, 5%).

**Table 5.** Recruitment target attainment (N = 300)

| Characteristic                                  | n (%)          |
|-------------------------------------------------|----------------|
| <b>Sample size</b>                              |                |
| Calculation reported                            | 155 (51.7)     |
| Recruitment target reached*                     | 102/145 (70.3) |
| <b>Recruitment delays reported</b>              |                |
| Yes                                             | 19 (6.3)       |
| No                                              | 281 (93.7)     |
| <b>Types of recruitment delays**</b>            |                |
| Trial level factors                             | 9/19 (47.4)    |
| Site level factors                              | 1/19 (5.3)     |
| Patient level factors                           | 10/19 (52.6)   |
| Trial team level factors                        | 1/19 (5.3)     |
| Not specified                                   | 4/19 (21.1)    |
| <b>How recruitment delays were addressed***</b> |                |
| Extending the recruitment period                | 3/19 (15.8)    |
| Adding additional trial sites                   | 2/19 (10.5)    |
| Modifying the eligibility criteria              | 3/19 (15.8)    |
| Modifying incentives                            | 1/19 (5.3)     |
| Stopping the trial before reaching the target   | 13/19 (68.4)   |

\*Based on sample size calculation and number randomized; data for this calculation were unavailable for 10 trials that reported a sample size calculation.

\*\*Total exceeds 19 because some trials reported more than one type of delay.

\*\*\*Total exceeds 19 because some trials reported more than one method.

## DISCUSSION

This study addresses some of the knowledge gaps and priorities identified by StaR Child Health's Consent and Recruitment Standard Development Group.<sup>3</sup> We found that details of consent and

1  
2  
3 recruitment procedures were infrequently reported within publications of pediatric trials. Although  
4 most trials reported obtaining consent, elaboration on the consent and recruitment process was not  
5 common.  
6  
7

8  
9  
10 Despite being widely accepted as a requirement,<sup>11, 21</sup> there remains ambiguity about what constitutes  
11 assent in pediatric trials,<sup>22</sup> which children are capable of providing it,<sup>22</sup> and how it should be reported.<sup>23</sup>  
12 Recently, Tait and Geisser (2017) established an operational definition of assent, including  
13 recommendations about the level of information appropriate for different ages.<sup>24</sup> Nevertheless,  
14 guidance on the age at which children must provide assent varies substantially by country.<sup>25-27</sup> It also  
15 remains unclear whether the level of detail regarding consent and recruitment procedures required by  
16 research ethics boards is appropriate or necessary in published reports of pediatric trials. In 2010, Saint-  
17 Raymond et al. called attention to the need for reporting guidelines specific to research with children.<sup>23</sup>  
18 The development of pediatric adaptations of the Standard Protocol Items: Recommendations for  
19 Interventional Trials<sup>28</sup> and Consolidated Standards of Reporting Trials<sup>29</sup> statements is underway.<sup>30</sup>  
20  
21  
22  
23  
24  
25  
26  
27

28 Fewer than 20% of trials reported who approached families to participate. Although a relationship to the  
29 person obtaining consent can encourage recruitment,<sup>31</sup> when the person is the child's healthcare  
30 provider parents may worry that refusing participation will impact their child's quality of care.<sup>22</sup> In most  
31 trials of school-aged children, trial information was directed to both parents and children. Parents' and  
32 children's understanding of trial materials are fundamental to ethical and efficient recruitment.<sup>3</sup> Not  
33 understanding trial information discourages parents and children from enrolling in trials,<sup>31</sup> and typical  
34 presentations of the benefits and risks of trial participation are often difficult for parents to  
35 understand.<sup>32</sup> The integrated consent model in which clinicians engage the trial participant in a consent  
36 conversation similar to usual care and additionally present the opportunity for the randomization of  
37 previously validated treatment options, has been proposed.<sup>33</sup> This approach has been suggested for low-  
38 risk and pragmatic trials,<sup>33</sup> however the applicability to pediatric trials needs to be established.  
39  
40  
41  
42  
43  
44  
45  
46  
47

48 Few trials reported whether incentives were used, but of those that did, many were intended for  
49 children. Trial participation can be costly for families, and there is general consensus that they should be  
50 reimbursed for the related expenses (e.g., travel, parking) at a rate that is sufficient but does not lead  
51 them to undervalue risks or coerce them to consent.<sup>22, 31</sup> As children value incentives differently than  
52 adults, their provision to minors is controversial.<sup>3, 10</sup> When incentives are used, it is critical that children  
53  
54  
55  
56  
57  
58  
59  
60

1  
2  
3 understand the implications of the trial and that the incentives do not influence their decision to  
4 participate.<sup>3,10</sup>  
5  
6  
7

8 Seventy percent of trials met their recruitment targets. This is substantially greater than the 29%  
9 reported in St-Louis et al.'s review of pediatric general surgical trials,<sup>34</sup> and the 55% in Sully et al.'s  
10 review of multicenter trials in the United Kingdom.<sup>35</sup> Failing to meet the recruitment target contributes  
11 to research waste when the trial is underpowered to detect clinically important differences.<sup>36</sup> Due to  
12 reporting deficiencies, we could only ascertain whether trials achieved their recruitment targets for half  
13 of the sample. Whether transparent reporting is biased toward trials that meet their recruitment targets  
14 is not yet known.  
15  
16  
17  
18  
19  
20  
21

### 22 **Strengths and Limitations**

23 We have highlighted a number of conduct and/or reporting gaps in an effort to contribute to the  
24 ongoing research agenda. Our sample will serve as a baseline for ongoing monitoring of consent and  
25 recruitment procedures in pediatric trials. The extracted data were limited to those available within  
26 published reports, therefore we cannot ascertain the extent to which the findings reflect conduct and/or  
27 reporting shortcomings. We used a sample of trials published in 2012, and the findings may not be  
28 generalizable to other years.  
29  
30  
31  
32  
33  
34

### 35 **CONCLUSIONS**

36 In our sample, five reporting shortcomings were evident: how families were recruited; who obtained  
37 consent and/or assent and how; who trial information was directed to; whether incentives were used;  
38 and sufficient data to determine if the recruitment target was met. Forthcoming reporting guidance  
39 specific to pediatric trials<sup>30</sup> and the StaR Child Health Standards<sup>3</sup> may contribute to improving the  
40 conduct and reporting of pediatric trials in this priority area. Using this study as a baseline, continued  
41 monitoring of the state of the research will allow for the identification of changes over time and the  
42 need for knowledge translation.  
43  
44  
45  
46  
47  
48  
49

### 50 **ACKNOWLEDGMENTS**

51 We thank Robin Featherstone (MLIS, University of Alberta, Edmonton, Canada) for running the search  
52 and Sarah Bryson, Huiru Dong, Aimee Gonzalez, Hamza Jafri, Karandeep Jassal, Megan Nuspl, Kassi  
53  
54  
55  
56  
57  
58  
59  
60



1  
2  
3 Shave, Jocelyn Shulhan, and Jaskiran Sidhu (research assistants at the Alberta Research Centre for  
4 Health Evidence, University of Alberta, Edmonton, Canada) for contributing to data extraction.  
5  
6  
7

## 8 **FUNDING**

9  
10 This research was funded by the Canadian Institutes of Health Research (#KRS 140989). The funder  
11 played no role in the design and conduct of the study; the collection, management, analysis and  
12 interpretation of the data; the preparation, review, or approval of the manuscript; nor the decision to  
13 submit the manuscript for publication.  
14  
15  
16  
17

## 18 **COMPETING INTERESTS**

19  
20 We have no financial or other conflicts of interest to declare.  
21  
22

## 23 **CONTRIBUTORS' STATEMENT**

24  
25 Dr Dyson conceptualized the study, designed the data collection instrument, supervised all aspects of  
26 the work, verified and analyzed the extracted data, and contributed to drafting the manuscript.  
27

28 Dr Gates verified and analyzed the extracted data, contributed to drafting the manuscript, and  
29 completed revisions of the manuscript drafts following input from the other authors.  
30

31 Drs Caldwell, Curtis, Dans, Hartling, Kelly, Fernandes, Woolfall, and Williams contributed to the  
32 interpretation of the extracted data, and revised manuscript drafts critically for important intellectual  
33 content.  
34  
35

36 All authors approved the final manuscript as submitted and agree to be accountable for all aspects of  
37 the work.  
38  
39  
40  
41

## 42 **DATA SHARING STATEMENT**

43 The data collected and analyzed from trials included in this study will be available to researchers via  
44 reasonable request from the corresponding author. The data will be available immediately following,  
45 and for 5 years after article publication. Our data extraction guide is available as a supplementary file.  
46  
47  
48  
49

## 50 **PREVIOUS PRESENTATION**

51  
52 Parts of this research were presented as a poster at our local research day (Pediatric Research Day,  
53 Department of Pediatrics, University of Alberta, Edmonton, Canada) on 16 May 2018 under the  
54  
55  
56  
57  
58  
59  
60

1  
2  
3 following title: "The safe and ethical participation of children in research: a descriptive analysis of the  
4 conduct and reporting of trials published in 2012".  
5  
6  
7  
8  
9

## 10 11 REFERENCES

- 12  
13 1. Wittmeier KD, Craig J, Klassen TP, et al. The mission of StaR Child Health is to improve the quality of  
14 the design, conduct, and reporting of pediatric clinical research by promoting the use of modern  
15 research standards. Introduction. *Pediatrics* 2012;129(Suppl 3):S111.  
16  
17
- 18 2. Hartling L, Wittmeier KD, Caldwell P, et al. StaR Child Health: developing evidence-based guidance  
19 for the design, conduct, and reporting of pediatric trials. *Pediatrics* 2012;129(Suppl 3):S112-17.  
20  
21
- 22 3. Caldwell PH, Dans L, de Vries MC, et al. Standard 1: consent and recruitment. *Pediatrics*  
23 2012;129(Suppl 3):S118-23.  
24
- 25 4. Ellenberg S, Fernandes RM, Saloojee H, et al. Standard 3: data monitoring committees. *Pediatrics*  
26 2012;129(Suppl 3):S132-7.  
27
- 28 5. Hartling L, Hamm M, Klassen T, et al. Standard 2: containing risk of bias. *Pediatrics* 2012;129(Suppl  
29 3):S124-31.  
30  
31
- 32 6. Sinha IP, Altman DG, Beresford MW, et al. Standard 5: selection, measurement, and reporting of  
33 outcomes in clinical trials in children. *Pediatrics* 2012;129(Suppl 3):S146-52.  
34
- 35 7. van der Tweel I, Askie L, Vandermeer B, et al. Standard 4: determining adequate sample sizes.  
36 *Pediatrics* 2012;129(Suppl 3):S138-45.  
37
- 38 8. Williams K, Thomson D, Seto I, et al. Standard 6: age groups for pediatric trials. *Pediatrics*  
39 2012;129(Suppl 3):S153-60.  
40  
41
- 42 9. Gates A, Hartling L, Vandermeer B, et al. The conduct and reporting of child health research: an  
43 analysis of randomized controlled trials published in 2012 and evaluation of change over 5 years. *J*  
44 *Pediatr* 2018;193:237-44.  
45  
46
- 47 10. Joseph PD, Craig JC, Caldwell PH. Clinical trials in children. *Br J Clin Pharmacol* 2015;79(3):357-69.  
48
- 49 11. Graham A, Powell M, Taylor N, et al. Ethical research involving children: putting the evidence into  
50 practice. *Family Matters* 2015;96:23-8.  
51
- 52 12. Ioannidis JP, Greenland S, Hlatky MA, et al. Increasing value and reducing waste in research design,  
53 conduct, and analysis. *Lancet* 2014;383:166-75.  
54  
55  
56  
57  
58  
59  
60

13. Glasziou P, Altman DG, Bossuyt P, et al. Reducing waste from incomplete or unusable reports of biomedical research. *Lancet* 2014;383:267-76.
14. Nayak BK. Understanding the relevance of sample size calculation. *Indian J Ophthalmol* 2010;58:469.
15. Hamm MP, Hartling L, Milne A, et al. A descriptive analysis of a representative sample of pediatric randomized controlled trials published in 2007. *BMC Pediatr* 2010;10:96.
16. Cochrane. Cochrane Central Register of Controlled Trials (CENTRAL). London, United Kingdom: Cochrane. c1999-2018. Available from: <http://www.cochranelibrary.com/about/central-landing-page.html>. Accessed 5 September 2018.
17. Harris PA, Taylor R, Thielke R, et al. Research electronic data capture (REDCap)--a metadata-driven methodology and workflow process for providing translational research informatics support. *J Biomed Inform* 2009;42:377-81.
18. World Health Organization. Classifications. International Classification of Diseases (ICD). ICD-10 online versions. Geneva, Switzerland: World Health Organization. 2018. Available from: <http://www.who.int/classifications/icd/icdonlineversions/en/>. Accessed 5 September 2018.
19. The World Bank. World Bank Country and Lending Groups. Washington, District of Columbia: The World Bank. 2018. Available from: <https://datahelpdesk.worldbank.org/knowledgebase/articles/906519-world-bank-country-and-lending-groups>. Accessed 11 September 2018.
20. Kaur G, Smyth RL, Williamson P. Developing a survey of barriers and facilitators to recruitment in randomized controlled trials. *Trials* 2012;13:218.
21. General Assembly of the World Medical Association. World Medical Association Declaration of Helsinki: ethical principles for medical research involving human subjects. *JAMA* 2013;310:2191-4.
22. Leibson T, Koren G. Informed consent in pediatric research. *Paediatr Drugs* 2015;17:5-11.
23. Saint-Raymond A, Hill S, Martines J, et al. CONSORT 2010. *Lancet* 2010;376(9737):229-30.
24. Tait AR, Geisser ME. Development of a consensus operational definition of child assent for research. *BMC Med Ethics* 2017;18:41.
25. Shaddy RE, Denne SC, The Committee on Drugs and Committee on Pediatric Research. Guidelines for the ethical conduct of studies to evaluate drugs in pediatric populations. *Pediatrics* 2010;125:850-60. Reaffirmed January 2014; 133:e1479.
26. Lepola P, Needham A, Mendum J, et al. Informed consent for paediatric clinical trials in Europe. *Arch Dis Child*. 2016;101:1017-25.

- 1
- 2
- 3 27. Canadian Paediatric Society. Ethical issues in health research in children. *Paediatr Child Health*
- 4 2008;13:707-20.
- 5
- 6 28. Chan A-W, Tetzlaff JM, Altman DG, et al. SPIRIT 2013 statement: defining standard protocol items
- 7 for clinical trials. *Ann Intern Med* 2013;158:200-7.
- 8
- 9 29. Schulz KF, Altman DG, Moher D. CONSORT 2010 statement: updated guidelines for reporting parallel
- 10 group randomised trials. *Trials* 2010;11:32.
- 11
- 12 30. Clyburne-Sherin AVP, Thurairajah P, Kapadia MZ, et al. Recommendations and evidence for
- 13 reporting items in pediatric clinical trial protocols and reports: two systematic reviews. *Trials*
- 14 2015;16:417.
- 15
- 16 31. Tromp K, Zwaan CM, van de Vathorst S. Motivations of children and their parents to participate in
- 17 drug research: a systematic review. *Eur J Pediatr* 2016;175:599-12.
- 18
- 19 32. Tait AR, Voepel-Lewis T, Zikmund-Fisher BJ, et al. Presenting research risks and benefits to parents:
- 20 does format matter? *Anesth Analg* 2010;111:718-23.
- 21
- 22 33. Kim SY, Miller FG. Informed consent for pragmatic trials: the integrated consent model. *NEJM*
- 23 2014;370:769-72.
- 24
- 25 34. St-Louis E, Oosenbrug M, Landry T, et al. Enrollment and reporting practices in pediatric general
- 26 surgical randomized clinical trials: a systematic review and observational analysis. *J Pediatr Surg*
- 27 2018;53:879-84.
- 28
- 29 35. Sully BG, Julious SA, Nicholl J. A reinvestigation of recruitment to randomised, controlled,
- 30 multicenter trials: a review of trials funded by two UK funding agencies. *Trials* 2013;14:166.
- 31
- 32 36. Salman RA-S, Beller E, Kagan J, Hemminki E, et al. Increasing value and reducing waste in biomedical
- 33 research regulation and management. *Lancet* 2014;383:176-85.
- 34
- 35
- 36
- 37
- 38
- 39
- 40
- 41
- 42
- 43
- 44
- 45
- 46
- 47
- 48
- 49
- 50
- 51
- 52
- 53
- 54
- 55
- 56
- 57
- 58
- 59
- 60

## Supplementary File 1. Search Strategy

**Summary of Search**

| Database                                               | Date Searched    | Number Retrieved | After Duplicate Removal |
|--------------------------------------------------------|------------------|------------------|-------------------------|
| Cochrane Central Register of Controlled Trials (Wiley) | November 4, 2013 | 2343             | 2296                    |
| <b>Total</b>                                           |                  | <b>2343</b>      | <b>2296</b>             |

Database: Cochrane Central Register of Controlled Trials (Wiley)

Date Searched: 4 November 2013 at 21:07:57.057

Results: 2343 records (2296 following duplicate removal)

Search Strategy:

#1 (Infant\* or infancy or Newborn\* or Baby\* or Babies or Neonat\* or Preterm\* or Prematur\* or Postmatur\* or Child\* or Schoolchild\* or School age\* or Preschool\* or Kid or kids or Toddler\* or Teen\* or Boy\* or Girl\* or Minors\* or Pubert\* or Pubescen\* or Prepubescen\* or Pediatric\* or Paediatric\* or Peadiatric\* or Nursery school\* or Kindergar\* or Primary school\* or Secondary school\* or Elementary school\* or High school\* or Highschool\*):ti,ab,kw

#2 (Adolesc\*):ti,ab

#3 (Infant or Child or Minors or Puberty or Pediatrics or Schools):kw

#4 #1 or #2 or #3

#5 adolescent\*:kw

#6 (adolescent\* and (adult\* or elderly or "middle aged" or "aged, 80 and over")):kw

#7 #6 and not #4

#8 #4 or #5

#9 #8 and not #7 from 2012 to 2012, in Trials

## Supplementary File 2. Data Extraction Guide

| Field                                                              | Response                                                                                                                                                                                                    | Comments                                                                                                                                                                                                                                                                                                                                                                                                                                                                                                                                                                                                                                                                                                                                                                                                                                                                            |
|--------------------------------------------------------------------|-------------------------------------------------------------------------------------------------------------------------------------------------------------------------------------------------------------|-------------------------------------------------------------------------------------------------------------------------------------------------------------------------------------------------------------------------------------------------------------------------------------------------------------------------------------------------------------------------------------------------------------------------------------------------------------------------------------------------------------------------------------------------------------------------------------------------------------------------------------------------------------------------------------------------------------------------------------------------------------------------------------------------------------------------------------------------------------------------------------|
| Trial conduct                                                      |                                                                                                                                                                                                             |                                                                                                                                                                                                                                                                                                                                                                                                                                                                                                                                                                                                                                                                                                                                                                                                                                                                                     |
| Where were participants recruited from?                            | <input type="checkbox"/> Low income country<br><input type="checkbox"/> Lower middle income country<br><input type="checkbox"/> Upper middle income country<br><input type="checkbox"/> High income country | Select all that apply.<br><br>Classified according to the World Bank income classifications, 2019 fiscal year. Expressed as GNI per capita:<br><b>Low income country:</b> <\$995/year<br><b>Lower middle income country:</b> \$996 to \$3895/year<br><b>Upper middle income country:</b> \$3896 to \$\$12055/year<br><b>High income country:</b> ≥\$12056/year<br><br><a href="https://datahelpdesk.worldbank.org/knowledgebase/articles/906519-world-bank-country-and-lending-groups">https://datahelpdesk.worldbank.org/knowledgebase/articles/906519-world-bank-country-and-lending-groups</a>                                                                                                                                                                                                                                                                                   |
| What recruitment strategies were used?                             | <input type="checkbox"/> Standard<br><input type="checkbox"/> Not standard                                                                                                                                  | <b>Standard:</b> Participants provide consent and then are randomized in a typical 1:1, 1:2, etc. manner.<br><b>Not standard:</b> Any of: <ul style="list-style-type: none"> <li>– Open trial design (randomization occurs before participants are approached, so that participants are informed of the treatment they were randomized to receive prior to consent)</li> <li>– Increasing or decreasing the chance of receiving the experimental treatment</li> <li>– Experimental treatment for all participants and standard treatment for non-participants</li> <li>– Standard care for all participants and experimental treatment for non-participants</li> <li>– Random assignment of treatment for participants and choice of treatment for non-participants</li> <li>– Opt in or opt out recruitment (consent was sought for participation or non-participation)</li> </ul> |
| Who first approached the patient about participating in the trial? | <input type="checkbox"/> Child's clinician<br><input type="checkbox"/> Researcher/clinician unknown to patient<br><input type="checkbox"/> Other (specify):<br><input type="checkbox"/> Not reported        | Other professionals could include individuals such as teachers.                                                                                                                                                                                                                                                                                                                                                                                                                                                                                                                                                                                                                                                                                                                                                                                                                     |
| How did the family first                                           | <input type="checkbox"/> Approached during healthcare                                                                                                                                                       | Select all that apply.                                                                                                                                                                                                                                                                                                                                                                                                                                                                                                                                                                                                                                                                                                                                                                                                                                                              |

## Supplementary File 2. Data Extraction Guide

|                                                     |                                                                                                                                                                                                                                                                                                                                                           |                                                                                                                                                                                                                                                                                                                                          |
|-----------------------------------------------------|-----------------------------------------------------------------------------------------------------------------------------------------------------------------------------------------------------------------------------------------------------------------------------------------------------------------------------------------------------------|------------------------------------------------------------------------------------------------------------------------------------------------------------------------------------------------------------------------------------------------------------------------------------------------------------------------------------------|
| hear about the trial?                               | visit<br><input type="checkbox"/> Generalized mailing<br><input type="checkbox"/> Targeted mailing<br><input type="checkbox"/> Personalized mailing<br><input type="checkbox"/> Phone calls<br><input type="checkbox"/> Media<br><input type="checkbox"/> Pamphlets<br><input type="checkbox"/> Not reported<br><input type="checkbox"/> Other (specify): | <b>Generalized mailing:</b> mail out to a large population<br><b>Targeted mailing:</b> mail out to a targeted group<br><b>Personalized mailing:</b> mailing addressed to the individual<br><b>Media:</b> Internet, newspaper, radio, TV<br><b>Pamphlets:</b> given to the families or left out for participants to pick up               |
| Who was the trial information targeted to?          | <input type="checkbox"/> Parents<br><input type="checkbox"/> Children<br><input type="checkbox"/> Both<br><input type="checkbox"/> Not reported                                                                                                                                                                                                           | "Trial information" refers to recruitment materials.                                                                                                                                                                                                                                                                                     |
| Did the authors report that consent was obtained?   | <input type="checkbox"/> Yes<br><input type="checkbox"/> No                                                                                                                                                                                                                                                                                               |                                                                                                                                                                                                                                                                                                                                          |
| If yes, who obtained consent from the participants? | <input type="checkbox"/> Child's clinician<br><input type="checkbox"/> Researcher/clinician unknown to patient<br><input type="checkbox"/> Other (specify):<br><input type="checkbox"/> Not reported                                                                                                                                                      | Other professionals could include individuals such as teachers.                                                                                                                                                                                                                                                                          |
| If yes, how was consent provided in the study?      | <input type="checkbox"/> Parental permission<br><input type="checkbox"/> Parental permission and participant assent<br><input type="checkbox"/> Consent of a mature minor<br><input type="checkbox"/> N/A                                                                                                                                                 | Can assume parental consent if consent reported but not specified, and no other indication that another model was used.                                                                                                                                                                                                                  |
| Were any incentives used in the study?              | <input type="checkbox"/> Yes<br><input type="checkbox"/> No<br><input type="checkbox"/> Not reported                                                                                                                                                                                                                                                      |                                                                                                                                                                                                                                                                                                                                          |
| If yes, what incentives were used?                  | <input type="checkbox"/> Reimbursement<br><input type="checkbox"/> Parents<br><input type="checkbox"/> Child<br><input type="checkbox"/> Families (no other detail)<br><input type="checkbox"/> Not reported<br><input type="checkbox"/> Compensation<br><input type="checkbox"/> Parents                                                                 | Select all that apply.<br><br><b>Reimbursement:</b> costs associated with participation in the study (e.g., travel, parking) are paid back.<br><b>Compensation:</b> participants are paid a modest amount for their time/effort.<br><b>Appreciation:</b> a small token gift given at the end of the study, usually not known beforehand. |

## Supplementary File 2. Data Extraction Guide

|                                                                                                   |                                                                                                                                                                                                                                                                                                                                                                                                                                                                                                                                                                                         |                                                                                                                                                                                                                                                                                                                                                                                                                                                                                                                                                                                                          |
|---------------------------------------------------------------------------------------------------|-----------------------------------------------------------------------------------------------------------------------------------------------------------------------------------------------------------------------------------------------------------------------------------------------------------------------------------------------------------------------------------------------------------------------------------------------------------------------------------------------------------------------------------------------------------------------------------------|----------------------------------------------------------------------------------------------------------------------------------------------------------------------------------------------------------------------------------------------------------------------------------------------------------------------------------------------------------------------------------------------------------------------------------------------------------------------------------------------------------------------------------------------------------------------------------------------------------|
|                                                                                                   | <input type="checkbox"/> Child<br><input type="checkbox"/> Families (no other detail)<br><input type="checkbox"/> Not reported<br><input type="checkbox"/> Appreciation<br><input type="checkbox"/> Parents<br><input type="checkbox"/> Child<br><input type="checkbox"/> Families (no other detail)<br><input type="checkbox"/> Not reported<br><input type="checkbox"/> Payment<br><input type="checkbox"/> Parents<br><input type="checkbox"/> Child<br><input type="checkbox"/> Families (no other detail)<br><input type="checkbox"/> Not reported<br><input type="checkbox"/> N/A | <p><b>Payment:</b> typically known before study participation and used as a strategy to enhance recruitment.</p> <p>*Use “families” only if specified as such in the publication, with no information provided on whether the incentives were meant for the parents or child.</p>                                                                                                                                                                                                                                                                                                                        |
| How long were participants given to decide whether or not to enroll in the trial?                 | <input type="checkbox"/> No restriction<br><input type="checkbox"/> Limited<br><input type="checkbox"/> No time<br><input type="checkbox"/> Not reported                                                                                                                                                                                                                                                                                                                                                                                                                                | <p><b>No restriction:</b> hours to weeks</p> <p><b>Limited:</b> immediately to less than a few hours</p> <p><b>No time:</b> retrospective consent</p>                                                                                                                                                                                                                                                                                                                                                                                                                                                    |
| Were any delays, shortfalls, or difficulties in recruitment reported once the trial was underway? | <input type="checkbox"/> Yes<br><input type="checkbox"/> No                                                                                                                                                                                                                                                                                                                                                                                                                                                                                                                             |                                                                                                                                                                                                                                                                                                                                                                                                                                                                                                                                                                                                          |
| If yes, what were the reasons for the delays or difficulties?                                     | <input type="checkbox"/> Trial level factors<br><input type="checkbox"/> Site level factors<br><input type="checkbox"/> Patient level factors<br><input type="checkbox"/> Clinical team level factors<br><input type="checkbox"/> Information and consent factors<br><input type="checkbox"/> Study team level factors<br><input type="checkbox"/> Other (specify):<br><input type="checkbox"/> N/A                                                                                                                                                                                     | <p>Examples (for more detail, see <i>Kaur Trials 2012</i>):</p> <p><b>Trial level:</b> funding, trial management, feasibility</p> <p><b>Site level:</b> competing projects, time to open up site</p> <p><b>Patient level:</b> travel, costs, duration of trial and follow-up, preferences, language or cultural barrier</p> <p><b>Information and consent:</b> amount and complexity of trial information provided, experience of clinical team seeking consent</p> <p><b>Study team level:</b> experience and training of team, clinical workload, clinician attitude towards research or treatment</p> |
| How were the recruitment delays or difficulties addressed?                                        | <input type="checkbox"/> Described (specify):<br><input type="checkbox"/> Not described<br><input type="checkbox"/> No difficulties                                                                                                                                                                                                                                                                                                                                                                                                                                                     |                                                                                                                                                                                                                                                                                                                                                                                                                                                                                                                                                                                                          |
| Was the use of patient or                                                                         | <input type="checkbox"/> Yes (specify):                                                                                                                                                                                                                                                                                                                                                                                                                                                                                                                                                 | For involvement in the <b>conduct</b> of the study, consider involvement past the                                                                                                                                                                                                                                                                                                                                                                                                                                                                                                                        |



## Supplementary File 2. Data Extraction Guide

|                                                                    |                                                                                                                                                                                                                                                                                                                                                                                                                                                                                                                                                                                                                                                                                                                                                                                                                                                                                                                                |                                                                                                                                                                                                                                                                                                             |
|--------------------------------------------------------------------|--------------------------------------------------------------------------------------------------------------------------------------------------------------------------------------------------------------------------------------------------------------------------------------------------------------------------------------------------------------------------------------------------------------------------------------------------------------------------------------------------------------------------------------------------------------------------------------------------------------------------------------------------------------------------------------------------------------------------------------------------------------------------------------------------------------------------------------------------------------------------------------------------------------------------------|-------------------------------------------------------------------------------------------------------------------------------------------------------------------------------------------------------------------------------------------------------------------------------------------------------------|
| family involvement in the design or conduct of the study reported? | <input type="checkbox"/> No                                                                                                                                                                                                                                                                                                                                                                                                                                                                                                                                                                                                                                                                                                                                                                                                                                                                                                    | point where a decision is made to participate, i.e., the participant/family has already enrolled prior to the involvement referred to.                                                                                                                                                                      |
| How was the study population selected?                             | <input type="checkbox"/> Inpatients<br><input type="checkbox"/> NICU<br><input type="checkbox"/> PICU<br><input type="checkbox"/> Not reported<br><input type="checkbox"/> Other (specify):<br><input type="checkbox"/> Outpatients<br><input type="checkbox"/> Clinicians' office<br><input type="checkbox"/> School<br><input type="checkbox"/> Community<br><input type="checkbox"/> Unclear<br><input type="checkbox"/> Other (specify):                                                                                                                                                                                                                                                                                                                                                                                                                                                                                   | Select all that apply.<br><br>In the case of selection from a dental clinic, report "Doctor's office."                                                                                                                                                                                                      |
| What primary diagnostic category was involved in the study?        | <input type="checkbox"/> Infectious and parasitic diseases<br><input type="checkbox"/> Neoplasms<br><input type="checkbox"/> Blood, blood forming organs, and immune mechanism<br><input type="checkbox"/> Endocrine, nutritional, and metabolic diseases<br><input type="checkbox"/> Mental and behavioural disorders<br><input type="checkbox"/> Nervous system<br><input type="checkbox"/> Eye and adnexa<br><input type="checkbox"/> Ear and mastoid process<br><input type="checkbox"/> Circulatory system<br><input type="checkbox"/> Respiratory system<br><input type="checkbox"/> Digestive system<br><input type="checkbox"/> Skin and subcutaneous tissue<br><input type="checkbox"/> Musculoskeletal system and connective tissue<br><input type="checkbox"/> Genitourinary system<br><input type="checkbox"/> Pregnancy, childbirth, and the puerperium<br><input type="checkbox"/> Conditions originating in the | Select the primary diagnostic category of the study using the ICD-10 classification system.<br><br><div style="text-align: right;"> <i>(ICD-10 Version:2010</i><br/> <a href="http://apps.who.int/classifications/icd10/browse/2010/en">http://apps.who.int/classifications/icd10/browse/2010/en</a> </div> |

Supplementary File 2. Data Extraction Guide

1  
2  
3  
4  
5  
6  
7  
8  
9  
10  
11  
12  
13  
14  
15  
16  
17  
18  
19  
20  
21  
22  
23  
24  
25  
26  
27  
28  
29  
30  
31  
32  
33  
34  
35  
36  
37  
38  
39  
40  
41  
42  
43  
44  
45  
46  
47

|                                                                                                                                                                |                                                                                                                                                                                                                                                                                                                                                                                                                                                                                                                                                                                       |                                                                                                                                                                      |
|----------------------------------------------------------------------------------------------------------------------------------------------------------------|---------------------------------------------------------------------------------------------------------------------------------------------------------------------------------------------------------------------------------------------------------------------------------------------------------------------------------------------------------------------------------------------------------------------------------------------------------------------------------------------------------------------------------------------------------------------------------------|----------------------------------------------------------------------------------------------------------------------------------------------------------------------|
|                                                                                                                                                                | perinatal period<br><input type="checkbox"/> Congenital malformations, deformations, and chromosomal abnormalities<br><input type="checkbox"/> Symptoms, signs, and abnormal clinical and laboratory findings, not elsewhere classified<br><input type="checkbox"/> Injury, poisoning, and consequences of external causes<br><input type="checkbox"/> External causes of morbidity and mortality<br><input type="checkbox"/> Factors influencing health status and contact with health services<br><input type="checkbox"/> Oral health<br><input type="checkbox"/> Other (specify): |                                                                                                                                                                      |
| Did the study exclude participants who had at least one chronic condition (other than the condition that was the focus of the trial) or a co-morbid condition? | <input type="checkbox"/> Yes<br><input type="checkbox"/> No<br><input type="checkbox"/> Unclear                                                                                                                                                                                                                                                                                                                                                                                                                                                                                       |                                                                                                                                                                      |
| <b>Sample size</b>                                                                                                                                             |                                                                                                                                                                                                                                                                                                                                                                                                                                                                                                                                                                                       |                                                                                                                                                                      |
| How many patients were approached to participate in the study?                                                                                                 |                                                                                                                                                                                                                                                                                                                                                                                                                                                                                                                                                                                       | Use NR if applicable.                                                                                                                                                |
| How many patients consented to participate in the study?                                                                                                       |                                                                                                                                                                                                                                                                                                                                                                                                                                                                                                                                                                                       | Use NR if applicable.<br><br>*This is not necessarily the same number as randomized.                                                                                 |
| How many participants were randomized?                                                                                                                         |                                                                                                                                                                                                                                                                                                                                                                                                                                                                                                                                                                                       | Total study n.                                                                                                                                                       |
| How many participants were analyzed?                                                                                                                           |                                                                                                                                                                                                                                                                                                                                                                                                                                                                                                                                                                                       | Total study n.<br>If the numbers differ for different outcomes or time points, report the number of participants analyzed for the primary outcome. If not specified, |

## Supplementary File 2. Data Extraction Guide

|                                              |                                                             |                                                |
|----------------------------------------------|-------------------------------------------------------------|------------------------------------------------|
|                                              |                                                             | use the <b>time of the first measurement</b> . |
| Was a sample size calculation reported?      | <input type="checkbox"/> Yes<br><input type="checkbox"/> No |                                                |
| If yes, what was the calculated sample size? |                                                             |                                                |

Confidential: For Review Only

# BMJ Paediatrics Open

## Consent and recruitment: the reporting of pediatric trials published in 2012

|                               |                                                                                                                                                                                                                                                                                                                                                                                                                                                                                                                                                                                                                                                                                                                                                                                                                                                            |
|-------------------------------|------------------------------------------------------------------------------------------------------------------------------------------------------------------------------------------------------------------------------------------------------------------------------------------------------------------------------------------------------------------------------------------------------------------------------------------------------------------------------------------------------------------------------------------------------------------------------------------------------------------------------------------------------------------------------------------------------------------------------------------------------------------------------------------------------------------------------------------------------------|
| Journal:                      | <i>BMJ Paediatrics Open</i>                                                                                                                                                                                                                                                                                                                                                                                                                                                                                                                                                                                                                                                                                                                                                                                                                                |
| Manuscript ID                 | bmjpo-2018-000369.R2                                                                                                                                                                                                                                                                                                                                                                                                                                                                                                                                                                                                                                                                                                                                                                                                                                       |
| Article Type:                 | Original article                                                                                                                                                                                                                                                                                                                                                                                                                                                                                                                                                                                                                                                                                                                                                                                                                                           |
| Date Submitted by the Author: | 01-Nov-2018                                                                                                                                                                                                                                                                                                                                                                                                                                                                                                                                                                                                                                                                                                                                                                                                                                                |
| Complete List of Authors:     | Gates, Allison; University of Alberta, Pediatrics<br>Caldwell, Patrina; University of Sydney, Discipline of Child and Adolescent Health and Centre for Kidney Research<br>Curtis, Sarah; University of Alberta, Department of Pediatrics<br>Dans, Leonila; University of the Philippines<br>Fernandes, Ricardo; Universidade de Lisboa, Faculdade de Medicina; Centro Hospitalar Lisboa Norte EPE, Department of Pediatrics<br>Hartling, Lisa; University of Alberta, Department of Pediatrics<br>Kelly, Lauren; University of Manitoba, Department of Pediatrics and Child Health; George and Fay Yee Centre for Healthcare Innovation, Clinical Trials Platform<br>Williams, Katrina; Royal Children's Hospital Melbourne; University of Melbourne<br>Woolfall, Kerry; Univ Liverpool<br>Dyson, Michele; University of Alberta, Department of Pediatrics |
| Keywords:                     | Data Collection, General Paediatrics                                                                                                                                                                                                                                                                                                                                                                                                                                                                                                                                                                                                                                                                                                                                                                                                                       |
|                               |                                                                                                                                                                                                                                                                                                                                                                                                                                                                                                                                                                                                                                                                                                                                                                                                                                                            |

SCHOLARONE™  
Manuscripts

1  
2  
3 **Title:** Consent and recruitment: the reporting of pediatric trials published in 2012  
4

5 **Authors:** Allison Gates, PhD<sup>a,b</sup>, Patrina Caldwell, PhD<sup>c</sup>, Sarah Curtis, MD<sup>b</sup>, Leonila Dans, MD<sup>d</sup>, Ricardo M  
6 Fernandes, MD, PhD<sup>e,f</sup>, Lisa Hartling, PhD<sup>a,b</sup>, Lauren E Kelly, PhD<sup>g,h</sup>, Katrina Williams, PhD<sup>i,j,k</sup>, Kerry Woolfall,  
7 PhD<sup>l</sup>, Michele P Dyson, PhD<sup>a,b</sup>  
8  
9

10  
11 **Affiliations:** <sup>a</sup>Alberta Research Centre for Health Evidence, University of Alberta, Edmonton, Canada;  
12 <sup>b</sup>Department of Pediatrics, University of Alberta, Edmonton, Canada; <sup>c</sup>Discipline of Child and Adolescent  
13 Health and Centre for Kidney Research, The University of Sydney, Sydney, Australia; <sup>d</sup>University of the  
14 Phillippines, Manila, Philippines; <sup>e</sup>Instituto de Medicina Molecular, Faculdade de Medicina, Universidade  
15 de Lisboa, Portugal; <sup>f</sup>Department of Pediatrics, Hospital de Santa Maria, Centro Hospitalar Lisboa Norte,  
16 Portugal; <sup>g</sup>Department of Pediatrics and Child Health, University of Manitoba, Winnipeg, Canada; <sup>h</sup>Clinical  
17 Trials Platform, George and Fay Yee Centre for Healthcare Innovation, Winnipeg, Canada; <sup>i</sup>Royal Children's  
18 Hospital, Melbourne, Australia; <sup>j</sup>University of Melbourne, Melbourne, Australia; <sup>k</sup>Murdoch Childrens  
19 Research Institute, Melbourne, Australia; and <sup>l</sup>Institute of Psychology, Health and Society, University of  
20 Liverpool, Liverpool, United Kingdom  
21  
22  
23  
24  
25  
26  
27  
28  
29

30 **Address correspondence to:** Dr. Allison Gates, Department of Pediatrics, University of Alberta, ECHA 4-  
31 482C, 11405 87 Ave NW, Edmonton, Alberta, Canada T6G 1C9, agates1@ualberta.ca, Phone: +1-780-492-  
32 8252, Fax: +1-780-248-5627.  
33  
34  
35

36 **Word count:** 2986 words  
37

38 **Key words:** pediatrics; medicine; clinical studies; study design  
39  
40  
41  
42  
43  
44  
45  
46  
47  
48  
49  
50  
51  
52  
53  
54  
55  
56  
57  
58  
59  
60

**ABSTRACT**

**Objectives.** We evaluated 300 pediatric trials to determine: the consent and recruitment strategies used; who trial information was targeted to; how incentives were used; and if they achieved their recruitment targets.

**Methods.** For this cross-sectional evaluation, we searched the Cochrane Central Register of Controlled trials for pediatric trials published in 2012 and randomly selected 300 that reported on outcomes for participants aged  $\leq 21$  years. We collected data on consent and recruitment procedures for each trial and undertook descriptive analyses in SPSS Statistics.

**Results.** All but one trial (99.7%) used a standard recruitment strategy. Most (92%) trials reported that consent was obtained but only 13% reported who obtained consent. Two-thirds (65%) of trials included school-aged participants, and of these 68% reported obtaining assent. Half (50%) of the trials reported who the trial information was targeted to. Most trials (75%) of school-aged participants targeted information toward children or children and their parents. Fourteen percent of trials reported using incentives, half (50%) of which were in the form of compensation. Only 48% of trials reported sufficient data to determine if their recruitment targets were achieved. Of these, 70% achieved their targets.

**Conclusions.** Notable reporting shortcomings included: how families were recruited into the trial; who obtained consent and/or assent and how; who trial information was directed to; whether incentives were used; and sufficient data to determine if the recruitment target was achieved. Forthcoming pediatric-specific reporting standards may improve reporting in this priority area. Our data provide a baseline for ongoing monitoring of the state of the research.

**WHAT IS KNOWN ABOUT THE SUBJECT**

- In 2012, Standards for Research in (StaR) Child Health published evidence-based guidance to inform ethically-sound recruitment and consent in pediatric trials, and identified knowledge gaps.
- To optimize the value of children’s participation in research, trialists must safeguard them from avoidable harm, use rigorous methodologies, and report their findings transparently.

**WHAT THIS STUDY ADDS**

- Reporting shortcomings included: how families were recruited; who obtained consent/assent; who trial information was directed to; whether incentives were used; if recruitment targets were reached.
- The data from this study will serve as a baseline for ongoing monitoring and evaluation of the state of the research.

## INTRODUCTION

In 2012, Standards for Research in (StaR) Child Health published six evidence-based Standards to guide the rigorous design, conduct, and reporting of pediatric trials.<sup>1, 2</sup> Each Standard<sup>3-8</sup> includes practice recommendations and a research agenda to address knowledge gaps. To characterize the state of the literature, we analyzed a random sample of 300 pediatric trials published in 2012<sup>9</sup> and identified various shortcomings in their conduct and reporting. Among other issues, most trials reported results that were at unclear or high risk of bias, and only 46% were registered in a clinical trial registry.<sup>9</sup>

Trialists are ethically obligated to optimize the value of children's participation in research by safeguarding them from avoidable harms,<sup>10, 11</sup> using rigorous methodologies,<sup>12</sup> and reporting their findings transparently.<sup>13</sup> Ethically-sound recruitment and consent procedures include: obtaining consent from parents and assent from children; approaching all eligible children and not unfairly excluding any children; providing families with age-appropriate trial information; ensuring that incentives do not influence children's decision-making; and clearly differentiating between elements of standard care and those that are part of the trial.<sup>3</sup> Safeguarding children from avoidable harm also includes carefully planned recruitment targets. Trials that recruit too many participants needlessly expose children to the burdens of research participation, while those that are underpowered to detect clinically meaningful effects contribute to research waste.<sup>14</sup>

In response to the knowledge gaps and priorities identified by the Consent and Recruitment Standard Development Group, we evaluated the consent and recruitment procedures for 300 pediatric trials to determine: the consent and recruitment strategies used; who trial information was targeted to; how incentives were used; and whether they achieved their recruitment targets.

## METHODS

### Context

The analyses presented herein are part of a larger study<sup>9, 15</sup> in which we characterized the conduct and reporting qualities of 300 pediatric trials published in 2012. A full description of the study methods appears in a previous publication.<sup>9</sup>

### Database search



1  
2  
3 In November 2013, a research librarian searched the Cochrane Central Register of Controlled Trials  
4 (CENTRAL) for randomized trials published in 2012 (Supplementary File 1). CENTRAL is a comprehensive  
5 database of reports of randomized and quasi-randomized trials, taken mainly from MEDLINE and  
6 Embase.<sup>16</sup> The 2012 publication date coincided with the publication of the Star Child Health Standards.  
7  
8  
9

### 10 11 **Trial selection**

12 2296 unique records were identified via the search. We ordered these randomly in Excel (v. 2016;  
13 Microsoft Corporation, Redmond, Washington) and selected the first 300 published trials that: (a)  
14 recruited participants aged 0 to 18 years, or (b) recruited both children and adults with an upper age limit  
15 of 21 years. The inclusion criteria were selected to match those used by Cochrane Child Health to select  
16 trials for their Trials Register (which originate from CENTRAL).<sup>17</sup> The sample size coincides with our  
17 previous evaluation of pediatric trials published in 2007.<sup>15</sup> The sample was not restricted by language,  
18 condition, intervention, or outcome type.  
19  
20  
21  
22  
23  
24  
25

### 26 27 **Data extraction**

28 For each included trial, we extracted data into REDCap (Research Electronic Data Capture)<sup>18</sup> pertaining to  
29 the characteristics of the: publication; trial design; intervention; trial conduct; trial sample; data  
30 monitoring committee and follow-up; outcomes and conclusions; risk of bias; and trial registration and  
31 protocol.<sup>9</sup> We also collected additional data to address the knowledge gaps and priorities outlined by the  
32 Standard Development Groups. An author (AG or MPD) verified the extracted data to identify errors or  
33 omissions.  
34  
35  
36  
37  
38  
39

40 The data extraction guide for the variables included in this report is in Supplementary File 2. The primary  
41 diagnostic category was classified according to the World Health Organization's International Statistical  
42 Classification of Diseases and Related Health Problems 10<sup>th</sup> Revision.<sup>19</sup> Participants' recruitment location  
43 was classified according to the World Bank income classification for the 2019 fiscal year.<sup>20</sup> The recruitment  
44 strategy was classified as standard if the participants provided consent and were then randomized in a  
45 typical manner (e.g., 1:1, 1:2). The reasons for recruitment delays were classified based on the definitions  
46 provided by Kaur et al.<sup>21</sup> Incentives were categorized as one or more of the following: reimbursements  
47 (costs associated with participation that are paid back, e.g., parking, travel); compensation (participants  
48 are paid a modest amount for their time and effort); tokens of appreciation (a small gift given at the end  
49 of the trial, usually not known beforehand); and incentive payments (typically known before participation  
50  
51  
52  
53  
54  
55  
56  
57  
58  
59  
60

1  
2  
3 and used to enhance recruitment). Children were considered to be of “school age” if they were >5 years  
4 old. Participants were considered “mature minors” if they were adolescents or young adults aged  $\geq 12$   
5 years. Whether children with chronic or co-morbid conditions were excluded was collected to estimate if  
6 children were fairly and equitably recruited into the trial.  
7  
8  
9

10  
11 We referred to protocols, trial registries, and associated publications to complement data extraction. Trial  
12 registers were sought via the International Clinical Trials Registry Platform, the ISRCTN Registry, and  
13 Google. Trial registers were located for 46% ( $n = 138/300$ ) of the trials.<sup>9</sup> Protocols or companion articles  
14 were used only when cited in the publications. Authors were not contacted to collect consent and  
15 recruitment details beyond those in published reports.  
16  
17  
18  
19

## 20 21 22 **Data analysis**

23 The data were exported to an Excel workbook for cleaning and to SPSS Statistics (v. 23; IBM Corporation,  
24 Armonk, New York) for descriptive analysis. To determine whether the recruitment target was reached,  
25 the result of the sample size calculation was compared to the number of participants enrolled in the trial.  
26 The data on the use of incentives were stratified by continent because allowable incentives for pediatric  
27 research vary by region (e.g., the European Union advocates banning all incentive payments for children,  
28 while incentive payments for children participating in trials are relatively common in the United States).<sup>10</sup>  
29  
30  
31  
32  
33  
34

## 35 36 **RESULTS**

### 37 **Patient population and consent and recruitment procedures**

38 Most trials recruited from high income countries<sup>20</sup> ( $n = 202/300$ , 67%) and 68% ( $n = 205/300$ ) reported  
39 excluding patients with co-morbid or chronic diseases (Table 1). Only one trial ( $n = 1/300$ , 0.3%) reported  
40 using a non-standard recruitment strategy (Zelen’s design, whereby participants are randomly allocated  
41 to treatment before seeking consent; participants can accept or decline the intervention offered). Only  
42 one trial ( $n = 1/300$ , 0.3%) reported a specified amount of time (seven days) for participants to decide  
43 whether to enroll. Seventeen percent ( $n = 51/300$ ) of trials reported who first spoke to the family about  
44 participating. The most common point of contact was a researcher or clinician unknown to the participant  
45 ( $n = 28/51$ , 55%).  
46  
47  
48  
49  
50  
51  
52

53 Most trials reported that consent was obtained ( $n = 275/300$ , 92%), but only 13% ( $n = 39/300$ ) reported  
54 who obtained consent. Ninety percent ( $n = 270/300$ ) of trials reported how consent was provided. Among  
55  
56  
57  
58  
59  
60

these, 55% (n = 149/270) obtained consent via parental permission and 43% (n = 117/270) via parental permission combined with participant assent. Four trials (2%) reported only obtaining the consent of a mature minor. These included trials of the following: corrective exercises for scoliosis; prevention of acute knee injuries in athletes; bright-light therapy for non-seasonal depression; and oxidant and antioxidant levels in patients with orthodontic tooth movement. Of trials that included school-aged participants (>5 years old; n = 196/300, 65%), 68% (n = 117/172) reported obtaining participant assent and 32% (n = 55/172) reported obtaining parental permission only. Three percent (n = 9/300) of trials reported that participants and families were involved in the design or conduct of the trial.

Nineteen percent (n = 56/300) of trials did not report the recruitment setting (or it was unclear). When clearly reported, most often trials recruited participants from inpatient populations (n = 74/300, 25%), outpatient populations (n = 51/300, 17%), or schools (n = 70/300, 23%).

**Table 1.** Characteristics of the patient populations and recruitment approaches (N = 300)

| Characteristic                                     | n (%)      |
|----------------------------------------------------|------------|
| <b>Recruitment location*</b>                       |            |
| Low income country                                 | 16 (5.3)   |
| Lower middle income country                        | 33 (11.0)  |
| Upper middle income country                        | 56 (18.7)  |
| High income country                                | 202 (67.3) |
| <b>Exclusion of patients with chronic diseases</b> |            |
| Yes                                                | 205 (68.3) |
| No                                                 | 59 (19.7)  |
| Unclear                                            | 36 (12.0)  |
| <b>Recruitment strategy</b>                        |            |
| Standard                                           | 299 (99.7) |
| Not standard                                       | 1 (0.3)    |
| <b>Time to decide whether to enroll</b>            |            |
| Limited                                            | 1 (0.3)    |
| Not reported                                       | 299 (99.7) |
| <b>Who first approached the patient</b>            |            |
| Child's clinician                                  | 8 (2.7)    |
| Researcher or clinician unknown to patient         | 28 (9.3)   |
| Other                                              | 15 (5.0)   |
| Not reported                                       | 249 (83.0) |
| <b>Consent obtained and reported</b>               |            |
| Yes                                                | 275 (91.7) |
| No                                                 | 25 (8.3)   |
| <b>Who obtained consent</b>                        |            |
| Child's clinician                                  | 2 (0.7)    |

|                                                                       |            |
|-----------------------------------------------------------------------|------------|
| Researcher or clinician unknown to patient                            | 31 (10.3)  |
| Other                                                                 | 6 (2.0)    |
| Not reported                                                          | 261 (87.0) |
| <b>How consent was provided</b>                                       |            |
| Parental permission                                                   | 149 (49.7) |
| Parental permission and participant assent                            | 117 (39.0) |
| Consent of a mature minor                                             | 4 (1.3)    |
| Not reported                                                          | 30 (10.0)  |
| <b>Patients/families involved in trial design/conduct</b>             |            |
| Reported                                                              | 9 (3.0)    |
| Not reported                                                          | 291 (97.0) |
| <b>Source of recruitment**</b>                                        |            |
| Inpatients                                                            | 74 (24.7)  |
| Outpatients                                                           | 51 (17.0)  |
| Clinician's office                                                    | 38 (12.7)  |
| School                                                                | 70 (23.3)  |
| Community                                                             | 44 (14.7)  |
| Other                                                                 | 14 (4.7)   |
| Unclear or not reported                                               | 56 (18.7)  |
| <b>Primary diagnostic category***</b>                                 |            |
| Mental and behavioral disorders                                       | 50 (16.7)  |
| Infectious and parasitic disease                                      | 39 (13.0)  |
| Respiratory system                                                    | 30 (10.0)  |
| Conditions originating in the perinatal period                        | 28 (9.3)   |
| Endocrine, nutritional, and metabolic diseases                        | 25 (8.3)   |
| Oral health                                                           | 19 (6.3)   |
| Factors influencing health status and contact with health services    | 13 (4.3)   |
| Digestive system                                                      | 10 (3.3)   |
| Blood, blood forming organs, and immune mechanism                     | 7 (2.3)    |
| Congenital malformations, deformations, and chromosomal abnormalities | 7 (2.3)    |
| Nervous system                                                        | 7 (2.3)    |
| Eye and adnexa                                                        | 5 (1.7)    |
| Ear and mastoid process                                               | 4 (1.3)    |
| Injury, poisoning, and consequences of external causes                | 4 (1.3)    |
| Circulatory system                                                    | 3 (1.0)    |
| External causes of morbidity and mortality                            | 3 (1.0)    |
| Genitourinary system                                                  | 3 (1.0)    |
| Musculoskeletal system and connective tissue                          | 3 (1.0)    |
| Neoplasms                                                             | 3 (1.0)    |
| Pregnancy, childbirth, and the puerperium                             | 2 (0.7)    |
| Skin and subcutaneous tissue                                          | 2 (0.7)    |
| Other                                                                 | 33 (11.0)  |

\*Defined according to the World Bank income classification, 2019 fiscal year.<sup>20</sup> Some trials recruited from more than one category.

1  
2  
3 \*\*Total exceeds 300 because some trials reported multiple sources.

4 \*\*\*Defined according to the International Statistical Classification of Diseases and Related Health  
5 Problems 10<sup>th</sup> Revision (2010).<sup>18</sup> These data have been previously reported, but are shown here for  
6 context.<sup>9</sup>  
7  
8  
9

### 10 **Who trial information was targeted to**

11 About two-thirds (n = 184/300, 61%) of trials reported how families were informed about the opportunity  
12 to participate (Table 2). Of these, 59% (n = 108/184) reported that parents were approached during a  
13 healthcare visit, 8% (n = 15/184) used mail invites, 4% (n = 7/184) approached parents by telephone, 14%  
14 (n = 26/184) used media messages (e.g., via the radio, newspaper, or a website), and 11% (n = 20/184)  
15 used pamphlets. Other methods (n = 63/184, 34%) included schools (i.e., school staff contacted parents  
16 about the trial), community contacts and word of mouth; and identifying potential participants through  
17 chart reviews or previous trials. Sixteen percent (n = 30/184) of trials used multiple means of informing  
18 families about the opportunity to participate.  
19  
20  
21  
22  
23  
24  
25

26  
27 Half (n = 151/300, 50%) of the trials reported the person who was the target of the trial information. Of  
28 these, 58% (n = 88/151) targeted the information toward parents only, 5% (n = 7/151) toward mature  
29 minors only, and 37% (n = 56/151) toward parents and children. Although it was not reported, we  
30 assumed that an additional 13% (n = 40/300) intended the information to be for parents, as participants  
31 were infants or children less than school age. When it was reported, all trials that included only  
32 participants ≤5 years of age directed the information to parents only (n = 64/64, 100%). Most trials (n =  
33 65/87, 75%) that included participants >5 years of age directed trial information either to mature minors  
34 only or both parents and children.  
35  
36  
37  
38  
39  
40  
41

42 **Table 2.** Formats used to present trial information to participants and families (N = 300)

| 43 <b>Characteristic</b>                        | 44 <b>n (%)</b> |
|-------------------------------------------------|-----------------|
| 45 <b>How the family heard about the trial*</b> |                 |
| 46 Approached during healthcare visit           | 108 (36.0)      |
| 47 Mailing                                      | 15 (5.0)        |
| 48 Generalized mailing                          | 4 (1.3)         |
| 49 Targeted mailing                             | 9 (3.0)         |
| 50 Personalized mailing                         | 2 (0.7)         |
| 51 Phone calls                                  | 7 (2.3)         |
| 52 Media                                        | 26 (8.7)        |
| 53 Pamphlets                                    | 20 (6.7)        |
| 54 Other                                        | 63 (21.0)       |

55  
56  
57  
58  
59  
60

|                                              |            |
|----------------------------------------------|------------|
| Not reported                                 | 116 (38.7) |
| <b>Who trial information was targeted to</b> |            |
| Parents                                      | 88 (29.3)  |
| Mature minors                                | 7 (2.3)    |
| Parents and children                         | 56 (18.7)  |
| Not reported                                 | 149 (49.7) |

\*Some trials used multiple approaches.

### Use of incentives

Most trials did not report whether incentives were used ( $n = 253/300$ , 84%) and five (2%) reported not using incentives. Fourteen percent ( $n = 42/300$ ) of trials reported using incentives. These were most often in the form of compensation ( $n = 21/42$ , 50%) and tokens of appreciation ( $n = 12/42$ , 29%) (five studies (12%) provided reimbursements and seven (17%) provided incentive payments). Reported compensation amounts varied, e.g., free dental care and \$20 for families participating in a 5-year dental amalgam trial; \$5 to \$10 gift cards for adolescents participating in a trial of telephone-based preventive health education and counseling. Tokens of appreciation also varied, e.g., an insecticide impregnated bed net and soap for families participating in a trial of therapeutic food for catch-up growth after malaria; \$40 for teachers participating in a trial of a school-based intervention. Tables 3 and 4 show the reported incentive use and types of incentives used stratified by continent of recruitment. The use of incentives was most often reported in studies that recruited from North America ( $n = 33/119$ , 28%). All studies that offered incentive payments recruited from North America.

The child was often the recipient of the incentive, rather than the parents or family: 20% ( $n = 1/5$ ) of reimbursements (e.g., \$5 for a bus ticket for travel), 48% ( $n = 10/21$ ) of compensation incentives (e.g., \$10 for completing a survey), 50% ( $n = 6/12$ ) of tokens of appreciation (e.g., \$10 gift certificate), and 83% ( $n = 5/6$ ) of incentive payments (e.g., \$50 supermarket gift cards) were intended for the participant.

**Table 3.** Use of incentives stratified by recruitment continent (N = 300)\*

| Recruitment continent | N   | Use of incentives, n (%) |         |              |
|-----------------------|-----|--------------------------|---------|--------------|
|                       |     | Yes                      | No      | Not reported |
| Africa                | 26  | 3 (11.5)                 | 1 (3.8) | 22 (84.6)    |
| Asia                  | 82  | 1 (1.2)                  | 2 (2.4) | 79 (96.3)    |
| Australia             | 18  | 3 (16.7)                 | 0 (0.0) | 15 (83.3)    |
| Europe                | 54  | 2 (3.7)                  | 3 (5.6) | 49 (90.7)    |
| North America         | 119 | 33 (27.7)                | 0 (0.0) | 86 (72.3)    |
| South America         | 9   | 0 (0.0)                  | 0 (0.0) | 9 (100.0)    |

\*Some studies recruited participants from more than one continent.

**Table 4.** Types of incentives used stratified by continent (N = 42)\*

| Recruitment continent | N  | Types of incentives used, n (%) |                        |                |          |
|-----------------------|----|---------------------------------|------------------------|----------------|----------|
|                       |    | Compensation                    | Tokens of appreciation | Reimbursements | Payments |
| Africa                | 3  | 2 (66.7)                        | 1 (33.3)               | 1 (33.3)       | 0 (0.0)  |
| Asia                  | 1  | 0 (0.0)                         | 1 (100.0)              | 0 (0.0)        | 0 (0.0)  |
| Australia             | 3  | 1 (33.3)                        | 0 (0.0)                | 2 (66.7)       | 0 (0.0)  |
| Europe                | 2  | 2 (100.0)                       | 0 (0.0)                | 0 (0.0)        | 0 (0.0)  |
| North America         | 33 | 16 (48.5)                       | 10 (30.3)              | 2 (6.1)        | 7 (21.2) |
| South America         | 0  | 0 (0.0)                         | 0 (0.0)                | 0 (0.0)        | 0 (0.0)  |

\*Some studies offered multiple types of incentives.

### Recruitment target attainment

About half (n = 145/300, 48%) of the trials reported sufficient information to determine if the recruitment target was achieved (Table 5). Of these, 70% (n = 102/145) recruited their target sample size. Of the studies that recruited their target sample size, four (3.9%) reported using incentives and three (2.9%) explicitly reported not using incentives.

Recruitment delays were reported in 6% (n = 19/300) of trials, and were most often due to patient level (n = 10/19, 53%; e.g., travel, duration of trial, preferences) or trial level factors (n = 9/19, 47%; e.g., funding, trial management, feasibility). Strategies to address recruitment delays included stopping the trial before the recruitment target was achieved (n = 13/19, 68%), extending the recruitment period (n = 3/19, 16%), adding trial sites (n = 2/19, 11%), modifying the eligibility criteria (n = 3/19, 16%), and modifying the incentives (n = 1/19, 5%).

**Table 5.** Recruitment target attainment (N = 300)

| Characteristic                       | n (%)          |
|--------------------------------------|----------------|
| <b>Sample size</b>                   |                |
| Calculation reported                 | 155 (51.7)     |
| Recruitment target reached*          | 102/145 (70.3) |
| <b>Recruitment delays reported</b>   |                |
| Yes                                  | 19 (6.3)       |
| No                                   | 281 (93.7)     |
| <b>Types of recruitment delays**</b> |                |
| Patient level factors                | 10/19 (52.6)   |
| Trial level factors                  | 9/19 (47.4)    |
| Site level factors                   | 1/19 (5.3)     |
| Trial team level factors             | 1/19 (5.3)     |
| Not specified                        | 4/19 (21.1)    |

| <b>How recruitment delays were addressed***</b> |              |
|-------------------------------------------------|--------------|
| Stopping the trial before reaching the target   | 13/19 (68.4) |
| Extending the recruitment period                | 3/19 (15.8)  |
| Modifying the eligibility criteria              | 3/19 (15.8)  |
| Adding additional trial sites                   | 2/19 (10.5)  |
| Modifying incentives                            | 1/19 (5.3)   |

\*Based on sample size calculation and number randomized; data for this calculation were unavailable for 10 trials that reported a sample size calculation.

\*\*Total exceeds 19 because some trials reported more than one type of delay.

\*\*\*Total exceeds 19 because some trials reported more than one method.

## DISCUSSION

This study addresses some of the knowledge gaps and priorities identified by StaR Child Health's Consent and Recruitment Standard Development Group.<sup>3</sup> We found that details of consent and recruitment procedures were infrequently reported within publications of pediatric trials. Although most trials reported obtaining consent, elaboration on the consent and recruitment process was not common. Our previous evaluation of risk of bias and trial registration among the same sample of trials and comparison to trials published in 2007 showed that some aspects of trial reporting had improved over time (e.g., reporting of allocation concealment improved and trial registration doubled). Because the trials evaluated herein were undertaken before the publication of the StaR Child Health Standards (and prior to the development of a number of international pediatric trials initiatives to improve infrastructure and research capacity in child health),<sup>10</sup> it is reasonable to speculate that research published today would be more completely reported compared to what we have presented. Nevertheless, reporting shortcomings likely remain and ongoing evaluation of the state of the research will be needed to inform areas in particular need for improvement.

Despite being widely accepted as a requirement,<sup>11, 22</sup> there remains ambiguity about what constitutes assent in pediatric trials,<sup>23</sup> which children are capable of providing it,<sup>23</sup> and how it should be reported.<sup>24</sup> Recently, Tait and Geisser (2017) established an operational definition of assent, including recommendations about the level of information appropriate for different ages.<sup>25</sup> Nevertheless, guidance on the age at which children must provide assent varies substantially by country.<sup>26-28</sup> It also remains unclear whether the level of detail regarding consent and recruitment procedures required by research ethics boards is appropriate or necessary in published reports of pediatric trials. In 2010, Saint-Raymond et al. called attention to the need for reporting guidelines specific to research with children.<sup>24</sup> The



1  
2  
3 development of pediatric adaptations of the Standard Protocol Items: Recommendations for  
4  
5  
6  
7  
8  
9  
10  
11  
12  
13  
14  
15  
16  
17  
18  
19  
20  
21  
22  
23  
24  
25  
26  
27  
28  
29  
30  
31  
32  
33  
34  
35  
36  
37  
38  
39  
40  
41  
42  
43  
44  
45  
46  
47  
48  
49  
50  
51  
52  
53  
54  
55  
56  
57  
58  
59  
60  
development of pediatric adaptations of the Standard Protocol Items: Recommendations for  
Interventional Trials<sup>29</sup> and Consolidated Standards of Reporting Trials<sup>30</sup> statements is underway.<sup>31</sup>

Fewer than 20% of trials reported who approached families to participate. Although a relationship to the person obtaining consent can encourage recruitment,<sup>32</sup> when the person is the child's healthcare provider parents may worry that refusing participation will impact their child's quality of care.<sup>23</sup> In most trials of school-aged children, trial information was directed to both parents and children. Parents' and children's understanding of trial materials are fundamental to ethical and efficient recruitment.<sup>3</sup> Not understanding trial information discourages parents and children from enrolling in trials,<sup>32</sup> and some presentations of the benefits and risks of trial participation (e.g., as dense text documents) can be difficult for parents to understand.<sup>33</sup> The integrated consent model in which clinicians engage the trial participant in a consent conversation similar to usual care and additionally present the opportunity for the randomization of previously validated treatment options, has been proposed.<sup>34</sup> This approach has been suggested for low-risk and pragmatic trials,<sup>34</sup> however the applicability to pediatric trials needs to be established.

Few trials reported whether incentives were used, but of those that did, many were intended for children. Trial participation can be costly for families, and there is general consensus that they should be reimbursed for the related expenses (e.g., travel, parking) at a rate that is sufficient but does not lead them to undervalue risks or coerce them to consent.<sup>22, 32</sup> As children value incentives differently than adults, their provision to minors is controversial.<sup>3, 10</sup> When incentives are used, it is critical that children understand the implications of the trial and that the incentives do not influence their decision to participate.<sup>3, 10</sup> As mentioned previously, allowable payment incentives for children who participate in trials vary by region. As expected, just 4% of studies that recruited in Europe reported providing incentives, all of which were in the form of compensation. Conversely, 28% of studies that recruited in North America reported providing incentives, and 21% percent of these were in the form of payments. Given the poor reporting of incentive use, it was not possible to conclude whether offering incentives improved the chance of attaining the recruitment target. Nevertheless, from the few studies that reported whether or not incentives were used, it did not appear that this was the case.

Seventy percent of trials met their recruitment targets. This is substantially greater than the 29% reported in St-Louis et al.'s review of pediatric general surgical trials,<sup>35</sup> and the 55% in Sully et al.'s review of multicenter trials in the United Kingdom.<sup>36</sup> Failing to meet the recruitment target contributes to research

1  
2  
3 waste when the trial is underpowered to detect clinically important differences.<sup>37</sup> Due to reporting  
4 deficiencies, we could only ascertain whether trials achieved their recruitment targets for half of the  
5 sample. Whether transparent reporting is biased toward trials that meet their recruitment targets is not  
6 yet known.  
7  
8  
9

### 10 11 **Strengths and Limitations**

12 We have highlighted a number of conduct and/or reporting gaps in an effort to contribute to the ongoing  
13 research agenda. Our sample will serve as a baseline for ongoing monitoring of consent and recruitment  
14 procedures in pediatric trials. The extracted data were limited to those available within published reports,  
15 therefore we cannot ascertain the extent to which the findings reflect conduct and/or reporting  
16 shortcomings. Because the sample included studies that reported on participants aged 0 to 21 years and  
17 from countries that varied by income, the sample was highly heterogeneous (i.e., consent procedures are  
18 different for infants compared to adolescents and young adults, and are highly influenced by cultural  
19 norms and local ethical standards) limiting generalizability to specific age groups or regions by income  
20 level. Further investigation into trials examining participants in more discrete age groups (e.g., infants,  
21 young children, adolescents) and in regions of a specific income level (e.g., low income, middle income)  
22 would be of interest. As we used a sample of trials published in 2012, the findings may not be generalizable  
23 to other years.  
24  
25  
26  
27  
28  
29  
30  
31  
32  
33

### 34 35 **CONCLUSIONS**

36 In our sample, five reporting shortcomings were evident: how families were recruited; who obtained  
37 consent and/or assent and how; who trial information was directed to; whether incentives were used;  
38 and sufficient data to determine if the recruitment target was met. Forthcoming reporting guidance  
39 specific to pediatric trials<sup>31</sup> and the StaR Child Health Standards<sup>3</sup> may contribute to improving the conduct  
40 and reporting of pediatric trials in this priority area. Using this study as a baseline, continued monitoring  
41 of the state of the research will allow for the identification of changes over time and the need for the  
42 translation of evidence-based standards into forms that are appealing and accessible to trialists.  
43  
44  
45  
46  
47  
48  
49

### 50 51 **ACKNOWLEDGMENTS**

52 We thank Robin Featherstone (MLIS, University of Alberta, Edmonton, Canada) for running the search  
53 and Sarah Bryson, Huiru Dong, Aimee Gonzalez, Hamza Jafri, Karandeep Jassal, Megan Nuspl, Kassi  
54  
55  
56  
57  
58  
59  
60

1  
2  
3 Shave, Jocelyn Shulhan, and Jaskiran Sidhu (research assistants at the Alberta Research Centre for  
4 Health Evidence, University of Alberta, Edmonton, Canada) for contributing to data extraction.  
5  
6  
7

### 8 **FUNDING**

9  
10 This research was funded by the Canadian Institutes of Health Research (#KRS 140989). The funder  
11 played no role in the design and conduct of the study; the collection, management, analysis and  
12 interpretation of the data; the preparation, review, or approval of the manuscript; nor the decision to  
13 submit the manuscript for publication.  
14  
15  
16  
17

### 18 **COMPETING INTERESTS**

19  
20 We have no financial or other conflicts of interest to declare.  
21  
22

### 23 **CONTRIBUTORS' STATEMENT**

24  
25 Dr Dyson conceptualized the study, designed the data collection instrument, supervised all aspects of  
26 the work, verified and analyzed the extracted data, and contributed to drafting the manuscript.

27  
28 Dr Gates verified and analyzed the extracted data, contributed to drafting the manuscript, and  
29 completed revisions of the manuscript drafts following input from the other authors.

30  
31 Drs Caldwell, Curtis, Dans, Hartling, Kelly, Fernandes, Woolfall, and Williams contributed to the  
32 interpretation of the extracted data, and revised manuscript drafts critically for important intellectual  
33 content.  
34  
35

36  
37 All authors approved the final manuscript as submitted and agree to be accountable for all aspects of  
38 the work.  
39  
40  
41

### 42 **DATA SHARING STATEMENT**

43  
44 The data collected and analyzed from trials included in this study will be available to researchers via  
45 reasonable request from the corresponding author. The data will be available immediately following, and  
46 for 5 years after article publication. Our data extraction guide is available as a supplementary file.  
47  
48  
49

### 50 **PREVIOUS PRESENTATION**

51  
52 Parts of this research were presented as a poster at our local research day (Pediatric Research Day,  
53 Department of Pediatrics, University of Alberta, Edmonton, Canada) on 16 May 2018 under the  
54  
55  
56  
57  
58  
59  
60

1  
2  
3 following title: "The safe and ethical participation of children in research: a descriptive analysis of the  
4 conduct and reporting of trials published in 2012".  
5  
6  
7

## 8 REFERENCES

- 10 1. Wittmeier KD, Craig J, Klassen TP, et al. The mission of StaR Child Health is to improve the quality of  
11 the design, conduct, and reporting of pediatric clinical research by promoting the use of modern  
12 research standards. Introduction. *Pediatrics* 2012;129(Suppl 3):S111.  
13
- 14 2. Hartling L, Wittmeier KD, Caldwell P, et al. StaR Child Health: developing evidence-based guidance  
15 for the design, conduct, and reporting of pediatric trials. *Pediatrics* 2012;129(Suppl 3):S112-17.  
16
- 17 3. Caldwell PH, Dans L, de Vries MC, et al. Standard 1: consent and recruitment. *Pediatrics*  
18 2012;129(Suppl 3):S118-23.  
19
- 20 4. Ellenberg S, Fernandes RM, Saloojee H, et al. Standard 3: data monitoring committees. *Pediatrics*  
21 2012;129(Suppl 3):S132-7.  
22
- 23 5. Hartling L, Hamm M, Klassen T, et al. Standard 2: containing risk of bias. *Pediatrics* 2012;129(Suppl  
24 3):S124-31.  
25
- 26 6. Sinha IP, Altman DG, Beresford MW, et al. Standard 5: selection, measurement, and reporting of  
27 outcomes in clinical trials in children. *Pediatrics* 2012;129(Suppl 3):S146-52.  
28
- 29 7. van der Tweel I, Askie L, Vandermeer B, et al. Standard 4: determining adequate sample sizes.  
30 *Pediatrics* 2012;129(Suppl 3):S138-45.  
31
- 32 8. Williams K, Thomson D, Seto I, et al. Standard 6: age groups for pediatric trials. *Pediatrics*  
33 2012;129(Suppl 3):S153-60.  
34
- 35 9. Gates A, Hartling L, Vandermeer B, et al. The conduct and reporting of child health research: an  
36 analysis of randomized controlled trials published in 2012 and evaluation of change over 5 years. *J*  
37 *Pediatr* 2018;193:237-44.  
38
- 39 10. Joseph PD, Craig JC, Caldwell PH. Clinical trials in children. *Br J Clin Pharmacol* 2015;79(3):357-69.  
40
- 41 11. Graham A, Powell M, Taylor N, et al. Ethical research involving children: putting the evidence into  
42 practice. *Family Matters* 2015;96:23-8.  
43
- 44 12. Ioannidis JP, Greenland S, Hlatky MA, et al. Increasing value and reducing waste in research design,  
45 conduct, and analysis. *Lancet* 2014;383:166-75.  
46
- 47 13. Glasziou P, Altman DG, Bossuyt P, et al. Reducing waste from incomplete or unusable reports of  
48 biomedical research. *Lancet* 2014;383:267-76.  
49
- 50 14. Nayak BK. Understanding the relevance of sample size calculation. *Indian J Ophthalmol* 2010;58:469.  
51  
52  
53  
54  
55  
56  
57  
58  
59  
60

15. Hamm MP, Hartling L, Milne A, et al. A descriptive analysis of a representative sample of pediatric randomized controlled trials published in 2007. *BMC Pediatr* 2010;10:96.
16. Cochrane. Cochrane Central Register of Controlled Trials (CENTRAL). London, United Kingdom: Cochrane. c1999-2018. Available from: <http://www.cochranelibrary.com/about/central-landing-page.html>. Accessed 5 September 2018.
17. Thomson D, Hartling L, Cohen E, et al. Controlled trials in children: quantity, methodological quality and descriptive characteristics of pediatric controlled trials published 1948-2006. *PLoS One* 2010;5:e13106.
18. Harris PA, Taylor R, Thielke R, et al. Research electronic data capture (REDCap)--a metadata-driven methodology and workflow process for providing translational research informatics support. *J Biomed Inform* 2009;42:377-81.
19. World Health Organization. Classifications. International Classification of Diseases (ICD). ICD-10 online versions. Geneva, Switzerland: World Health Organization. 2018. Available from: <http://www.who.int/classifications/icd/icdonlineversions/en/>. Accessed 5 September 2018.
20. The World Bank. World Bank Country and Lending Groups. Washington, District of Columbia: The World Bank. 2018. Available from: <https://datahelpdesk.worldbank.org/knowledgebase/articles/906519-world-bank-country-and-lending-groups>. Accessed 11 September 2018.
21. Kaur G, Smyth RL, Williamson P. Developing a survey of barriers and facilitators to recruitment in randomized controlled trials. *Trials* 2012;13:218.
22. General Assembly of the World Medical Association. World Medical Association Declaration of Helsinki: ethical principles for medical research involving human subjects. *JAMA* 2013;310:2191-4.
23. Leibson T, Koren G. Informed consent in pediatric research. *Paediatr Drugs* 2015;17:5-11.
24. Saint-Raymond A, Hill S, Martines J, et al. CONSORT 2010. *Lancet* 2010;376(9737):229-30.
25. Tait AR, Geisser ME. Development of a consensus operational definition of child assent for research. *BMC Med Ethics* 2017;18:41.
26. Shaddy RE, Denne SC, The Committee on Drugs and Committee on Pediatric Research. Guidelines for the ethical conduct of studies to evaluate drugs in pediatric populations. *Pediatrics* 2010;125:850-60. Reaffirmed January 2014; 133:e1479.
27. Lepola P, Needham A, Mendum J, et al. Informed consent for paediatric clinical trials in Europe. *Arch Dis Child*. 2016;101:1017-25.

- 1
- 2
- 3 28. Canadian Paediatric Society. Ethical issues in health research in children. *Paediatr Child Health*
- 4 2008;13:707-20.
- 5
- 6 29. Chan A-W, Tetzlaff JM, Altman DG, et al. SPIRIT 2013 statement: defining standard protocol items
- 7 for clinical trials. *Ann Intern Med* 2013;158:200-7.
- 8
- 9 30. Schulz KF, Altman DG, Moher D. CONSORT 2010 statement: updated guidelines for reporting parallel
- 10 group randomised trials. *Trials* 2010;11:32.
- 11
- 12 31. Clyburne-Sherin AVP, Thurairajah P, Kapadia MZ, et al. Recommendations and evidence for
- 13 reporting items in pediatric clinical trial protocols and reports: two systematic reviews. *Trials*
- 14 2015;16:417.
- 15
- 16 32. Tromp K, Zwaan CM, van de Vathorst S. Motivations of children and their parents to participate in
- 17 drug research: a systematic review. *Eur J Pediatr* 2016;175:599-12.
- 18
- 19 33. Tait AR, Voepel-Lewis T, Zikmund-Fisher BJ, et al. Presenting research risks and benefits to parents:
- 20 does format matter? *Anesth Analg* 2010;111:718-23.
- 21
- 22 34. Kim SY, Miller FG. Informed consent for pragmatic trials: the integrated consent model. *NEJM*
- 23 2014;370:769-72.
- 24
- 25 35. St-Louis E, Oosenbrug M, Landry T, et al. Enrollment and reporting practices in pediatric general
- 26 surgical randomized clinical trials: a systematic review and observational analysis. *J Pediatr Surg*
- 27 2018;53:879-84.
- 28
- 29 36. Sully BG, Julious SA, Nicholl J. A reinvestigation of recruitment to randomised, controlled,
- 30 multicenter trials: a review of trials funded by two UK funding agencies. *Trials* 2013;14:166.
- 31
- 32 37. Salman RA-S, Beller E, Kagan J, Hemminki E, et al. Increasing value and reducing waste in biomedical
- 33 research regulation and management. *Lancet* 2014;383:176-85.
- 34
- 35
- 36
- 37
- 38
- 39
- 40
- 41
- 42
- 43
- 44
- 45
- 46
- 47
- 48
- 49
- 50
- 51
- 52
- 53
- 54
- 55
- 56
- 57
- 58
- 59
- 60

## Supplementary File 1. Search Strategy

**Summary of Search**

| Database                                               | Date Searched    | Number Retrieved | After Duplicate Removal |
|--------------------------------------------------------|------------------|------------------|-------------------------|
| Cochrane Central Register of Controlled Trials (Wiley) | November 4, 2013 | 2343             | 2296                    |
| <b>Total</b>                                           |                  | <b>2343</b>      | <b>2296</b>             |

Database: Cochrane Central Register of Controlled Trials (Wiley)

Date Searched: 4 November 2013 at 21:07:57.057

Results: 2343 records (2296 following duplicate removal)

Search Strategy:

#1 (Infant\* or infancy or Newborn\* or Baby\* or Babies or Neonat\* or Preterm\* or Prematur\* or Postmatur\* or Child\* or Schoolchild\* or School age\* or Preschool\* or Kid or kids or Toddler\* or Teen\* or Boy\* or Girl\* or Minors\* or Pubert\* or Pubescen\* or Prepubescen\* or Pediatric\* or Paediatric\* or Peadiatric\* or Nursery school\* or Kindergar\* or Primary school\* or Secondary school\* or Elementary school\* or High school\* or Highschool\*):ti,ab,kw

#2 (Adolesc\*):ti,ab

#3 (Infant or Child or Minors or Puberty or Pediatrics or Schools):kw

#4 #1 or #2 or #3

#5 adolescent\*:kw

#6 (adolescent\* and (adult\* or elderly or "middle aged" or "aged, 80 and over")):kw

#7 #6 and not #4

#8 #4 or #5

#9 #8 and not #7 from 2012 to 2012, in Trials

## Supplementary File 2. Data Extraction Guide

| Field                                                              | Response                                                                                                                                                                                                    | Comments                                                                                                                                                                                                                                                                                                                                                                                                                                                                                                                                                                                                                                                                                                                                                                                                                                                                            |
|--------------------------------------------------------------------|-------------------------------------------------------------------------------------------------------------------------------------------------------------------------------------------------------------|-------------------------------------------------------------------------------------------------------------------------------------------------------------------------------------------------------------------------------------------------------------------------------------------------------------------------------------------------------------------------------------------------------------------------------------------------------------------------------------------------------------------------------------------------------------------------------------------------------------------------------------------------------------------------------------------------------------------------------------------------------------------------------------------------------------------------------------------------------------------------------------|
| Trial conduct                                                      |                                                                                                                                                                                                             |                                                                                                                                                                                                                                                                                                                                                                                                                                                                                                                                                                                                                                                                                                                                                                                                                                                                                     |
| Where were participants recruited from?                            | <input type="checkbox"/> Low income country<br><input type="checkbox"/> Lower middle income country<br><input type="checkbox"/> Upper middle income country<br><input type="checkbox"/> High income country | Select all that apply.<br><br>Classified according to the World Bank income classifications, 2019 fiscal year. Expressed as GNI per capita:<br><b>Low income country:</b> <\$995/year<br><b>Lower middle income country:</b> \$996 to \$3895/year<br><b>Upper middle income country:</b> \$3896 to \$\$12055/year<br><b>High income country:</b> ≥\$12056/year<br><br><a href="https://datahelpdesk.worldbank.org/knowledgebase/articles/906519-world-bank-country-and-lending-groups">https://datahelpdesk.worldbank.org/knowledgebase/articles/906519-world-bank-country-and-lending-groups</a>                                                                                                                                                                                                                                                                                   |
| What recruitment strategies were used?                             | <input type="checkbox"/> Standard<br><input type="checkbox"/> Not standard                                                                                                                                  | <b>Standard:</b> Participants provide consent and then are randomized in a typical 1:1, 1:2, etc. manner.<br><b>Not standard:</b> Any of: <ul style="list-style-type: none"> <li>– Open trial design (randomization occurs before participants are approached, so that participants are informed of the treatment they were randomized to receive prior to consent)</li> <li>– Increasing or decreasing the chance of receiving the experimental treatment</li> <li>– Experimental treatment for all participants and standard treatment for non-participants</li> <li>– Standard care for all participants and experimental treatment for non-participants</li> <li>– Random assignment of treatment for participants and choice of treatment for non-participants</li> <li>– Opt in or opt out recruitment (consent was sought for participation or non-participation)</li> </ul> |
| Who first approached the patient about participating in the trial? | <input type="checkbox"/> Child's clinician<br><input type="checkbox"/> Researcher/clinician unknown to patient<br><input type="checkbox"/> Other (specify):<br><input type="checkbox"/> Not reported        | Other professionals could include individuals such as teachers.                                                                                                                                                                                                                                                                                                                                                                                                                                                                                                                                                                                                                                                                                                                                                                                                                     |
| How did the family first                                           | <input type="checkbox"/> Approached during healthcare                                                                                                                                                       | Select all that apply.                                                                                                                                                                                                                                                                                                                                                                                                                                                                                                                                                                                                                                                                                                                                                                                                                                                              |



## Supplementary File 2. Data Extraction Guide

|                                                     |                                                                                                                                                                                                                                                                                                                                                           |                                                                                                                                                                                                                                                                                                                                          |
|-----------------------------------------------------|-----------------------------------------------------------------------------------------------------------------------------------------------------------------------------------------------------------------------------------------------------------------------------------------------------------------------------------------------------------|------------------------------------------------------------------------------------------------------------------------------------------------------------------------------------------------------------------------------------------------------------------------------------------------------------------------------------------|
| hear about the trial?                               | visit<br><input type="checkbox"/> Generalized mailing<br><input type="checkbox"/> Targeted mailing<br><input type="checkbox"/> Personalized mailing<br><input type="checkbox"/> Phone calls<br><input type="checkbox"/> Media<br><input type="checkbox"/> Pamphlets<br><input type="checkbox"/> Not reported<br><input type="checkbox"/> Other (specify): | <b>Generalized mailing:</b> mail out to a large population<br><b>Targeted mailing:</b> mail out to a targeted group<br><b>Personalized mailing:</b> mailing addressed to the individual<br><b>Media:</b> Internet, newspaper, radio, TV<br><b>Pamphlets:</b> given to the families or left out for participants to pick up               |
| Who was the trial information targeted to?          | <input type="checkbox"/> Parents<br><input type="checkbox"/> Children<br><input type="checkbox"/> Both<br><input type="checkbox"/> Not reported                                                                                                                                                                                                           | "Trial information" refers to recruitment materials.                                                                                                                                                                                                                                                                                     |
| Did the authors report that consent was obtained?   | <input type="checkbox"/> Yes<br><input type="checkbox"/> No                                                                                                                                                                                                                                                                                               |                                                                                                                                                                                                                                                                                                                                          |
| If yes, who obtained consent from the participants? | <input type="checkbox"/> Child's clinician<br><input type="checkbox"/> Researcher/clinician unknown to patient<br><input type="checkbox"/> Other (specify):<br><input type="checkbox"/> Not reported                                                                                                                                                      | Other professionals could include individuals such as teachers.                                                                                                                                                                                                                                                                          |
| If yes, how was consent provided in the study?      | <input type="checkbox"/> Parental permission<br><input type="checkbox"/> Parental permission and participant assent<br><input type="checkbox"/> Consent of a mature minor<br><input type="checkbox"/> N/A                                                                                                                                                 | Can assume parental consent if consent reported but not specified, and no other indication that another model was used.                                                                                                                                                                                                                  |
| Were any incentives used in the study?              | <input type="checkbox"/> Yes<br><input type="checkbox"/> No<br><input type="checkbox"/> Not reported                                                                                                                                                                                                                                                      |                                                                                                                                                                                                                                                                                                                                          |
| If yes, what incentives were used?                  | <input type="checkbox"/> Reimbursement<br><input type="checkbox"/> Parents<br><input type="checkbox"/> Child<br><input type="checkbox"/> Families (no other detail)<br><input type="checkbox"/> Not reported<br><input type="checkbox"/> Compensation<br><input type="checkbox"/> Parents                                                                 | Select all that apply.<br><br><b>Reimbursement:</b> costs associated with participation in the study (e.g., travel, parking) are paid back.<br><b>Compensation:</b> participants are paid a modest amount for their time/effort.<br><b>Appreciation:</b> a small token gift given at the end of the study, usually not known beforehand. |

## Supplementary File 2. Data Extraction Guide

|                                                                                                   |                                                                                                                                                                                                                                                                                                                                                                                                                                                                                                                                                                                         |                                                                                                                                                                                                                                                                                                                                                                                                                                                                                                                                                                                                          |
|---------------------------------------------------------------------------------------------------|-----------------------------------------------------------------------------------------------------------------------------------------------------------------------------------------------------------------------------------------------------------------------------------------------------------------------------------------------------------------------------------------------------------------------------------------------------------------------------------------------------------------------------------------------------------------------------------------|----------------------------------------------------------------------------------------------------------------------------------------------------------------------------------------------------------------------------------------------------------------------------------------------------------------------------------------------------------------------------------------------------------------------------------------------------------------------------------------------------------------------------------------------------------------------------------------------------------|
|                                                                                                   | <input type="checkbox"/> Child<br><input type="checkbox"/> Families (no other detail)<br><input type="checkbox"/> Not reported<br><input type="checkbox"/> Appreciation<br><input type="checkbox"/> Parents<br><input type="checkbox"/> Child<br><input type="checkbox"/> Families (no other detail)<br><input type="checkbox"/> Not reported<br><input type="checkbox"/> Payment<br><input type="checkbox"/> Parents<br><input type="checkbox"/> Child<br><input type="checkbox"/> Families (no other detail)<br><input type="checkbox"/> Not reported<br><input type="checkbox"/> N/A | <p><b>Payment:</b> typically known before study participation and used as a strategy to enhance recruitment.</p> <p>*Use “families” only if specified as such in the publication, with no information provided on whether the incentives were meant for the parents or child.</p>                                                                                                                                                                                                                                                                                                                        |
| How long were participants given to decide whether or not to enroll in the trial?                 | <input type="checkbox"/> No restriction<br><input type="checkbox"/> Limited<br><input type="checkbox"/> No time<br><input type="checkbox"/> Not reported                                                                                                                                                                                                                                                                                                                                                                                                                                | <p><b>No restriction:</b> hours to weeks</p> <p><b>Limited:</b> immediately to less than a few hours</p> <p><b>No time:</b> retrospective consent</p>                                                                                                                                                                                                                                                                                                                                                                                                                                                    |
| Were any delays, shortfalls, or difficulties in recruitment reported once the trial was underway? | <input type="checkbox"/> Yes<br><input type="checkbox"/> No                                                                                                                                                                                                                                                                                                                                                                                                                                                                                                                             |                                                                                                                                                                                                                                                                                                                                                                                                                                                                                                                                                                                                          |
| If yes, what were the reasons for the delays or difficulties?                                     | <input type="checkbox"/> Trial level factors<br><input type="checkbox"/> Site level factors<br><input type="checkbox"/> Patient level factors<br><input type="checkbox"/> Clinical team level factors<br><input type="checkbox"/> Information and consent factors<br><input type="checkbox"/> Study team level factors<br><input type="checkbox"/> Other (specify):<br><input type="checkbox"/> N/A                                                                                                                                                                                     | <p>Examples (for more detail, see <i>Kaur Trials 2012</i>):</p> <p><b>Trial level:</b> funding, trial management, feasibility</p> <p><b>Site level:</b> competing projects, time to open up site</p> <p><b>Patient level:</b> travel, costs, duration of trial and follow-up, preferences, language or cultural barrier</p> <p><b>Information and consent:</b> amount and complexity of trial information provided, experience of clinical team seeking consent</p> <p><b>Study team level:</b> experience and training of team, clinical workload, clinician attitude towards research or treatment</p> |
| How were the recruitment delays or difficulties addressed?                                        | <input type="checkbox"/> Described (specify):<br><input type="checkbox"/> Not described<br><input type="checkbox"/> No difficulties                                                                                                                                                                                                                                                                                                                                                                                                                                                     |                                                                                                                                                                                                                                                                                                                                                                                                                                                                                                                                                                                                          |
| Was the use of patient or                                                                         | <input type="checkbox"/> Yes (specify):                                                                                                                                                                                                                                                                                                                                                                                                                                                                                                                                                 | For involvement in the <b>conduct</b> of the study, consider involvement past the                                                                                                                                                                                                                                                                                                                                                                                                                                                                                                                        |

Supplementary File 2. Data Extraction Guide

|                                                                           |                                                                                                                                                                                                                                                                                                                                                                                                                                                                                                                                                                                                                                                                                                                                                                                                                                                                                                                                                     |                                                                                                                                                                                                                                                                                                        |
|---------------------------------------------------------------------------|-----------------------------------------------------------------------------------------------------------------------------------------------------------------------------------------------------------------------------------------------------------------------------------------------------------------------------------------------------------------------------------------------------------------------------------------------------------------------------------------------------------------------------------------------------------------------------------------------------------------------------------------------------------------------------------------------------------------------------------------------------------------------------------------------------------------------------------------------------------------------------------------------------------------------------------------------------|--------------------------------------------------------------------------------------------------------------------------------------------------------------------------------------------------------------------------------------------------------------------------------------------------------|
| <p>family involvement in the design or conduct of the study reported?</p> | <p><input type="checkbox"/>No</p>                                                                                                                                                                                                                                                                                                                                                                                                                                                                                                                                                                                                                                                                                                                                                                                                                                                                                                                   | <p>point where a decision is made to participate, i.e., the participant/family has already enrolled prior to the involvement referred to.</p>                                                                                                                                                          |
| <p>How was the study population selected?</p>                             | <p><input type="checkbox"/>Inpatients<br/> <input type="checkbox"/>NICU<br/> <input type="checkbox"/>PICU<br/> <input type="checkbox"/>Not reported<br/> <input type="checkbox"/>Other (specify):<br/> <input type="checkbox"/>Outpatients<br/> <input type="checkbox"/>Clinicians' office<br/> <input type="checkbox"/>School<br/> <input type="checkbox"/>Community<br/> <input type="checkbox"/>Unclear<br/> <input type="checkbox"/>Other (specify):</p>                                                                                                                                                                                                                                                                                                                                                                                                                                                                                        | <p>Select all that apply.</p> <p>In the case of selection from a dental clinic, report "Doctor's office."</p>                                                                                                                                                                                          |
| <p>What primary diagnostic category was involved in the study?</p>        | <p><input type="checkbox"/>Infectious and parasitic diseases<br/> <input type="checkbox"/>Neoplasms<br/> <input type="checkbox"/>Blood, blood forming organs, and immune mechanism<br/> <input type="checkbox"/>Endocrine, nutritional, and metabolic diseases<br/> <input type="checkbox"/>Mental and behavioural disorders<br/> <input type="checkbox"/>Nervous system<br/> <input type="checkbox"/>Eye and adnexa<br/> <input type="checkbox"/>Ear and mastoid process<br/> <input type="checkbox"/>Circulatory system<br/> <input type="checkbox"/>Respiratory system<br/> <input type="checkbox"/>Digestive system<br/> <input type="checkbox"/>Skin and subcutaneous tissue<br/> <input type="checkbox"/>Musculoskeletal system and connective tissue<br/> <input type="checkbox"/>Genitourinary system<br/> <input type="checkbox"/>Pregnancy, childbirth, and the puerperium<br/> <input type="checkbox"/>Conditions originating in the</p> | <p>Select the primary diagnostic category of the study using the ICD-10 classification system.</p> <p style="text-align: right;"><i>(ICD-10 Version:2010</i><br/> <a href="http://apps.who.int/classifications/icd10/browse/2010/en">http://apps.who.int/classifications/icd10/browse/2010/en</a>)</p> |

Supplementary File 2. Data Extraction Guide

|                                                                                                                                                                       |                                                                                                                                                                                                                                                                                                                                                                                                                                                                                                                                                                                                                                                                                 |                                                                                                                                                                              |
|-----------------------------------------------------------------------------------------------------------------------------------------------------------------------|---------------------------------------------------------------------------------------------------------------------------------------------------------------------------------------------------------------------------------------------------------------------------------------------------------------------------------------------------------------------------------------------------------------------------------------------------------------------------------------------------------------------------------------------------------------------------------------------------------------------------------------------------------------------------------|------------------------------------------------------------------------------------------------------------------------------------------------------------------------------|
|                                                                                                                                                                       | <p>perinatal period</p> <ul style="list-style-type: none"> <li><input type="checkbox"/> Congenital malformations, deformations, and chromosomal abnormalities</li> <li><input type="checkbox"/> Symptoms, signs, and abnormal clinical and laboratory findings, not elsewhere classified</li> <li><input type="checkbox"/> Injury, poisoning, and consequences of external causes</li> <li><input type="checkbox"/> External causes of morbidity and mortality</li> <li><input type="checkbox"/> Factors influencing health status and contact with health services</li> <li><input type="checkbox"/> Oral health</li> <li><input type="checkbox"/> Other (specify):</li> </ul> |                                                                                                                                                                              |
| <p>Did the study exclude participants who had at least one chronic condition (other than the condition that was the focus of the trial) or a co-morbid condition?</p> | <ul style="list-style-type: none"> <li><input type="checkbox"/> Yes</li> <li><input type="checkbox"/> No</li> <li><input type="checkbox"/> Unclear</li> </ul>                                                                                                                                                                                                                                                                                                                                                                                                                                                                                                                   |                                                                                                                                                                              |
| <p>Sample size</p>                                                                                                                                                    |                                                                                                                                                                                                                                                                                                                                                                                                                                                                                                                                                                                                                                                                                 |                                                                                                                                                                              |
| <p>How many patients were approached to participate in the study?</p>                                                                                                 |                                                                                                                                                                                                                                                                                                                                                                                                                                                                                                                                                                                                                                                                                 | <p>Use NR if applicable.</p>                                                                                                                                                 |
| <p>How many patients consented to participate in the study?</p>                                                                                                       |                                                                                                                                                                                                                                                                                                                                                                                                                                                                                                                                                                                                                                                                                 | <p>Use NR if applicable.<br/>*This is not necessarily the same number as randomized.</p>                                                                                     |
| <p>How many participants were randomized?</p>                                                                                                                         |                                                                                                                                                                                                                                                                                                                                                                                                                                                                                                                                                                                                                                                                                 | <p>Total study n.</p>                                                                                                                                                        |
| <p>How many participants were analyzed?</p>                                                                                                                           |                                                                                                                                                                                                                                                                                                                                                                                                                                                                                                                                                                                                                                                                                 | <p>Total study n.<br/>If the numbers differ for different outcomes or time points, report the number of participants analyzed for the primary outcome. If not specified,</p> |

Supplementary File 2. Data Extraction Guide

|                                              |                                                             |                                               |
|----------------------------------------------|-------------------------------------------------------------|-----------------------------------------------|
|                                              |                                                             | use the <b>time of the first measurement.</b> |
| Was a sample size calculation reported?      | <input type="checkbox"/> Yes<br><input type="checkbox"/> No |                                               |
| If yes, what was the calculated sample size? |                                                             |                                               |

Confidential: For Review Only

1  
2  
3  
4  
5  
6  
7  
8  
9  
10  
11  
12  
13  
14  
15  
16  
17  
18  
19  
20  
21  
22  
23  
24  
25  
26  
27  
28  
29  
30  
31  
32  
33  
34  
35  
36  
37  
38  
39  
40  
41  
42  
43  
44  
45  
46  
47
